# Supplementary material for: Diagnosis and management of asthma in children
Source: PubMed Central journal article supplement — BMJ Paediatr Open. 2022 Apr 26;6(1):e001277. doi: 10.1136/bmjpo-2021-001277 (PMC9045042; doi:10.1136/bmjpo-2021-001277), 2022-04-26
Supplement: bmjpo-2021-001277.draft_revisions.pdf [file bmjpo-2021-001277.draft_revisions.pdf]

# BMJ Paediatrics Open

BMJ Paediatrics Open is committed to open peer review. As part of this commitment we make the peer review history of every article we publish publicly available.

When an article is published we post the peer reviewers' comments and the authors' responses online. We also post the versions of the paper that were used during peer review. These are the versions that the peer review comments apply to.

The versions of the paper that follow are the versions that were submitted during the peer review process. They are not the versions of record or the final published versions. They should not be cited or distributed as the published version of this manuscript.

BMJ Paediatrics Open is an open access journal and the full, final, typeset and author-corrected version of record of the manuscript is available on our site with no access controls, subscription charges or pay-per-view fees (<http://bmjpaedsopen.bmj.com>).

If you have any questions on BMJ Paediatrics Open's open peer review process please email [info.bmjpo@bmj.com](mailto:info.bmjpo@bmj.com)

# BMJ Paediatrics Open

## Diagnosis and management of asthma in children

|                               |                                                                                                                                                                                                                                                                                                                                        |
|-------------------------------|----------------------------------------------------------------------------------------------------------------------------------------------------------------------------------------------------------------------------------------------------------------------------------------------------------------------------------------|
| Journal:                      | <i>BMJ Paediatrics Open</i>                                                                                                                                                                                                                                                                                                            |
| Manuscript ID                 | bmjpo-2021-001277                                                                                                                                                                                                                                                                                                                      |
| Article Type:                 | Review                                                                                                                                                                                                                                                                                                                                 |
| Date Submitted by the Author: | 01-Mar-2022                                                                                                                                                                                                                                                                                                                            |
| Complete List of Authors:     | Martin, Joanne; Newcastle University, Translational and Clinical Research Institute<br>Townshend, Jennifer; Great North Children's Hospital, Paediatric Respiratory Medicine<br>Brodie, Malcolm; Newcastle University, Translational and Clinical Research Institute; Great North Children's Hospital, Paediatric Respiratory Medicine |
| Keywords:                     | Therapeutics                                                                                                                                                                                                                                                                                                                           |
|                               |                                                                                                                                                                                                                                                                                                                                        |

SCHOLARONE™  
Manuscripts

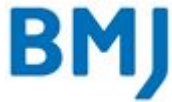

I, the Submitting Author has the right to grant and does grant on behalf of all authors of the Work (as defined in the below author licence), an exclusive licence and/or a non-exclusive licence for contributions from authors who are: i) UK Crown employees; ii) where BMJ has agreed a CC-BY licence shall apply, and/or iii) in accordance with the terms applicable for US Federal Government officers or employees acting as part of their official duties; on a worldwide, perpetual, irrevocable, royalty-free basis to BMJ Publishing Group Ltd ("BMJ") its licensees and where the relevant Journal is co-owned by BMJ to the co-owners of the Journal, to publish the Work in this journal and any other BMJ products and to exploit all rights, as set out in our [licence](#).

The Submitting Author accepts and understands that any supply made under these terms is made by BMJ to the Submitting Author unless you are acting as an employee on behalf of your employer or a postgraduate student of an affiliated institution which is paying any applicable article publishing charge ("APC") for Open Access articles. Where the Submitting Author wishes to make the Work available on an Open Access basis (and intends to pay the relevant APC), the terms of reuse of such Open Access shall be governed by a Creative Commons licence – details of these licences and which [Creative Commons](#) licence will apply to this Work are set out in our licence referred to above.

Other than as permitted in any relevant BMJ Author's Self Archiving Policies, I confirm this Work has not been accepted for publication elsewhere, is not being considered for publication elsewhere and does not duplicate material already published. I confirm all authors consent to publication of this Work and authorise the granting of this licence.

## Diagnosis and management of asthma in children

Joanne Martin<sup>1,2,3</sup>, Jennifer Townshend\*<sup>4</sup> and Malcolm Brodlie\*<sup>1,4</sup>

<sup>1</sup>Translational and Clinical Research Institute, Faculty of Medical Sciences, Newcastle University, Newcastle upon Tyne, United Kingdom

<sup>2</sup>Northern Foundation School, Health Education England North East, Newcastle upon Tyne, United Kingdom

<sup>3</sup>James Cook University Hospital, South Tees NHS Foundation Trust, Middlesbrough, United Kingdom

<sup>4</sup>Paediatric Respiratory Medicine, Great North Children's Hospital, Newcastle upon Tyne Hospitals NHS Foundation Trust, Newcastle upon Tyne, United Kingdom

\*Equal contribution

Corresponding author: Malcolm Brodlie, Paediatric Respiratory Medicine, Great North Children's Hospital, Level 3, Clinical Resource Building, Royal Victoria Infirmary, Newcastle upon Tyne, United Kingdom. NE1 4LP. E-mail [malcolm.brodlie@ncl.ac.uk](mailto:malcolm.brodlie@ncl.ac.uk)

Word count: 2728

Keywords: asthma; paediatrics; diagnosis; management; children

**ABSTRACT**

Asthma is the commonest chronic respiratory condition of childhood worldwide, with around 14% of children and young people affected. Despite the high prevalence, paediatric asthma outcomes are inadequate and there are several avoidable deaths each year. Characteristic asthma features include wheeze, shortness of breath and cough. Asthma symptoms are typically triggered by a number of possible stimuli. There are several diagnostic challenges and as a result, both over and under diagnosis of paediatric asthma remain problematic.

Effective asthma management involves a holistic approach addressing both pharmacological and non-pharmacological management, as well as education and self-management aspects. Working in partnership with children and families is key in promoting good asthma outcomes. Education on trigger avoidance, modifiable risk factors and actions to take during acute attacks via personalised asthma action plans is essential.

This review aims to provide an overview of good clinical practice in the diagnosis and management of paediatric asthma. We discuss the current diagnostic challenges and predictors of life-threatening attacks. Additionally, we outline the similarities and differences in global paediatric asthma guidelines and highlight potential future developments in care. It is hoped that this review will be a useful tool for all health care providers working in a range of child health settings.

## INTRODUCTION

Asthma is a chronic respiratory disease characterised by episodes of wheeze, cough, and shortness of breath. Around 14% of children worldwide have a diagnosis of asthma, making it the most common chronic respiratory disease of childhood(1).

Poor asthma control is associated with a number of negative effects on children and families. For example, they are more likely to be absent from school, have additional educational needs and have lower educational attainment(2). Caregivers also experience missed work days and financial challenges as a result(3). Some children will experience severe symptoms and life threatening attacks(4).

Paediatric asthma outcomes are poor overall and most pertinently there are several preventable deaths each year. Alarmingly, the National Review of Asthma Deaths (NRAD) in the United Kingdom found that in almost all paediatric cases, there were a number of significant avoidable contributing factors and that these deaths may have been preventable(5).

There are several factors that make the diagnosis and management of asthma in children challenging. The aim of this review is to explore these issues and highlight good clinical practice in the diagnosis and management of paediatric asthma.

## PRESENTATION OF ASTHMA

Children with asthma typically present with a symptom triad of wheeze, shortness of breath and cough. However, 'asthma' is an umbrella term used to describe this collection of symptoms and when present should prompt practitioners to ask, "what type of asthma is this?". There are a number of asthma subtypes that present and respond to treatment differently. Identification of the features of asthma and modifiable or treatable traits should only be the start of the diagnostic journey(6). Asthma symptoms are normally intermittent

1  
2  
3 in nature and may not be present at the time of clinical review, making the diagnosis  
4 challenging in some cases for health care professionals(7). Additionally, disease  
5 phenotypes are not fixed and may evolve over time necessitating ongoing review of  
6 symptoms and treatment(8).  
7  
8  
9

10  
11 Wheeze is a key feature of asthma and if not present, a diagnosis of asthma in a child is  
12 unlikely. Wheeze is an expiratory high-pitched whistle that occurs as a result of  
13 inflammation and narrowing of the small airways. Parental understanding of wheeze  
14 varies and clarifying what is meant when it is reported is key in making an accurate  
15 diagnosis(9).  
16  
17  
18  
19

20  
21  
22 The prevalence of 'preschool wheeze' is an additional challenge when diagnosing asthma  
23 in young children. In the first few years of life, many children will experience wheeze,  
24 however not all will go on to develop true asthma. The diagnosis of asthma should  
25 therefore be reviewed routinely, to identify true asthma and alter treatment where  
26 necessary(10). Favourable response to an appropriate trial of asthma treatment is an  
27 important confirmatory piece of diagnostic evidence.  
28  
29  
30  
31

32  
33  
34 Clinical examination may be normal in children and adolescents with asthma if they  
35 present during asymptomatic periods. During acute attacks, use of accessory muscles of  
36 respiration and widespread wheeze may be present(11). Chest hyperinflation may be  
37 identified in acute and chronic disease settings.  
38  
39  
40  
41

## 42 43 44 **ASTHMA TRIGGERS**

45  
46  
47  
48 Asthma attacks commonly occur following exposure to one or several triggers. Viral  
49 respiratory infections remain the leading cause of asthma attacks in children(12), however  
50 there are a number of other known triggers (Table 1), including aeroallergens, second  
51 hand smoke exposure or changes in ambient air temperature or humidity. Identification  
52  
53  
54  
55  
56  
57  
58  
59  
60

and documentation of specific asthma triggers should be part of routine care. Education on trigger recognition and avoidance is essential in providing good asthma care.

**Table 1. Common asthma triggers**

|                                                                       |
|-----------------------------------------------------------------------|
| Viral respiratory tract infections(5)                                 |
| Exercise(5, 13)                                                       |
| Weather changes in temperature and humidity(5, 13)                    |
| Domestic pollutants - e.g. pests, mould, dust mites(5)                |
| Environmental pollutants - e.g. air pollution(5)                      |
| Secondhand smoke exposure(12, 13)                                     |
| Pets and animals(12)                                                  |
| Strong odours(12)                                                     |
| Anxiety or strong emotions(13)                                        |
| Drugs – e.g. non-steroidal anti-inflammatory drugs, beta-blockers(13) |
| Gastro-oesophageal reflux(13)                                         |

## RISK FACTORS FOR ASTHMA

There are a number of risk factors that should be explored in the history of children who present with features of asthma. In symptomatic children, a personal or family history of atopic features, including asthma, eczema or rhinitis, supports a diagnosis of asthma. Some additional risk factors are outlined in Table 2. Education on modifiable risk factors, for example, exposure to second hand smoke and obesity, should be delivered routinely during consultations and asthma reviews.



**Table 2. Asthma risk factors**

|                                                                                      |
|--------------------------------------------------------------------------------------|
| Personal or family history of atopy - eczema, allergic rhinitis, nasal polyposis(14) |
| Family history of asthma(14)                                                         |
| Exposure to second hand smoke(14)                                                    |
| Preterm birth(15)                                                                    |
| Low birth weight(16)                                                                 |
| Obesity(17)                                                                          |
| Poor housing quality/mould and dampness(5)                                           |

## PAEDIATRIC ASTHMA PHENOTYPES

Asthma is a heterogeneous disease in which there are several phenotypes and underlying endotypes. Phenotypes are subtypes of asthma that share clinical characteristics such as symptom triggers, atopic features, disease severity and response to treatment. Endotypes are subtypes of asthma that are characterised by similar underlying biological mechanisms(18).

Key endotypes include 'T2 high' and 'T2 low' asthma. Identifying asthma phenotypes and endotypes can facilitate targeted treatment based on the pathophysiology occurring in a specific individual. For example, eosinophilic asthma (T2 high) is characterised by a number of different inflammatory biomarkers including high eosinophils, immunoglobulin (Ig) E and fractional exhaled nitric oxide (FeNO) levels(18), and typically responds well to inhaled corticosteroid (ICS) treatment(6). A number of biologic agents can be used in the management of asthma, under specialist supervision, and their use varies on asthma endotypes (Table 8)(19).

## DIFFERENTIAL DIAGNOSES AND DIAGNOSTIC UNCERTAINTY

Misdiagnosis of asthma remains a major problem with rates of both under- and over-diagnosis being high(20). Overdiagnosis is problematic as it exposes children to unnecessary side effects of medications and runs the risk of trivialising asthma(6).

There are several conditions that may be associated with chronic cough, wheeze and/or shortness of breath in children and therefore present similarly to asthma (Table 3). Due to the difficulties with diagnosis, especially in young children where objective testing is not possible, the diagnosis of 'asthma' should be reviewed at each clinical presentation and interaction.

**Table 3. Asthma differentials and clues in medical history**

| Differential diagnosis                                             | Possible features of history                                                                                                                                                                                                                                         |
|--------------------------------------------------------------------|----------------------------------------------------------------------------------------------------------------------------------------------------------------------------------------------------------------------------------------------------------------------|
| Cystic fibrosis(21, 22)                                            | <ul style="list-style-type: none"> <li>- Symptoms present from birth</li> <li>- Finger clubbing</li> <li>- Family History of cystic fibrosis or unexplained/atypical respiratory disease</li> <li>- Weight faltering</li> <li>- Gastrointestinal symptoms</li> </ul> |
| Primary ciliary dyskinesia(22)                                     | <ul style="list-style-type: none"> <li>- Symptoms present from birth</li> <li>- Family history of unexplained respiratory symptoms</li> <li>- Persistent cough</li> <li>- Nasal symptoms</li> </ul>                                                                  |
| Chronic lung disease of prematurity/bronchopulmonary dysplasia(22) | <ul style="list-style-type: none"> <li>- Premature</li> </ul>                                                                                                                                                                                                        |
| Bronchiectasis(21, 22)                                             | <ul style="list-style-type: none"> <li>- Persistent productive cough</li> <li>- Finger clubbing</li> </ul>                                                                                                                                                           |
| Laryngeal dysfunction(22)                                          | <ul style="list-style-type: none"> <li>- Stridor</li> <li>- Abnormal cry</li> </ul>                                                                                                                                                                                  |
| Gastro-oesophageal reflux disease or                               | <ul style="list-style-type: none"> <li>- Vomiting</li> </ul>                                                                                                                                                                                                         |

|                                                                     |                                                                                                                      |
|---------------------------------------------------------------------|----------------------------------------------------------------------------------------------------------------------|
| aspiration(21)                                                      | <ul style="list-style-type: none"> <li>- Weight faltering</li> <li>- Recurrent infections</li> </ul>                 |
| Structural abnormality - e.g. bronchomalacia, bronchogenic cyst(23) | <ul style="list-style-type: none"> <li>- Present from birth</li> <li>- No variation to wheeze</li> </ul>             |
| Immunodeficiency(23)                                                | <ul style="list-style-type: none"> <li>- Weight faltering</li> <li>- Recurrent and/or atypical infections</li> </ul> |
| Foreign body aspiration(23)                                         | <ul style="list-style-type: none"> <li>- Sudden onset</li> <li>- Unilateral chest features</li> </ul>                |

## DIAGNOSING ASTHMA IN CHILDREN

There is no single 'gold-standard' test that can be used to accurately diagnose asthma. In practice, a diagnosis should be made based on characteristic symptom patterns, evidence of variability in airflow limitation in the presence of airway inflammation, likelihood of alternative diagnoses and response to treatment. Getting the diagnosis correct is key for optimal management of paediatric asthma.

Lung function tests can be used to aid the diagnosis of asthma in children over the age of 5 years. Peak expiratory flow (PEF) and spirometry are commonly used to assess airflow obstruction and reversibility. PEF can be used to detect diurnal variation, which is a typical feature of asthma. The Global Initiative for Asthma (GINA) recommends the use of either PEF or spirometry in the diagnosis of asthma in children over 5 years(24). In children under 5 lung function testing is rarely practical out with a research setting. This makes diagnosis in this age group additionally challenging(15). Guidelines vary between countries and regions with regard to diagnostic criteria. An overview of the similarities and differences between these guidelines is displayed in Table 4.

FeNO and allergy testing are additional tools that can be used to aid the diagnosis of asthma(21, 25, 26). FeNO is used to detect and quantify eosinophilic airway inflammation

1  
2  
3 with levels elevated in those with eosinophilic asthma and normal in non-eosinophilic  
4 asthma(27). Allergy testing (skin prick testing or measurement of specific-IgE levels) is  
5 not routinely carried out in the diagnostic process; however, it is recommended in a  
6 number of clinical guidelines and may identify individual triggers(25, 26, 28, 29).  
7  
8  
9

10  
11  
12 There are several other aspects that make paediatric asthma diagnosis challenging. Most  
13 diagnoses are made in primary care where there is little access to spirometry, FeNO or  
14 allergy testing. Additionally, the symptom onset for most cases of paediatric asthma  
15 occurs before the age of 3 years(30) when lung function testing cannot be used to aid  
16 diagnosis. In this age group, response to an asthma treatment trial is useful to aid  
17 diagnostic decision making and is recommended in a number of national guidelines(29,  
18 31-33).  
19  
20  
21  
22  
23  
24  
25  
26  
27  
28  
29  
30  
31  
32  
33  
34  
35  
36  
37  
38  
39  
40  
41  
42  
43  
44  
45  
46  
47  
48  
49  
50  
51  
52  
53  
54  
55  
56  
57  
58  
59  
60

**Table 4. Summary of paediatric asthma national guidelines – focusing on diagnosis.**

| Guideline                                 | Year | Diagnostic criteria                                                                                                                                                                                                                                                                                                                              | Recommended objective testing                                                                                                                                                          | When to refer to a specialist                                                                                                                                                            | When to consider alternative diagnoses                                                  | Identification of high risk patients                                                   |
|-------------------------------------------|------|--------------------------------------------------------------------------------------------------------------------------------------------------------------------------------------------------------------------------------------------------------------------------------------------------------------------------------------------------|----------------------------------------------------------------------------------------------------------------------------------------------------------------------------------------|------------------------------------------------------------------------------------------------------------------------------------------------------------------------------------------|-----------------------------------------------------------------------------------------|----------------------------------------------------------------------------------------|
| NICE Guidelines (United Kingdom)(21)      | 2017 | <u>Under 5 years</u><br>Findings in clinical history and examination that are suggestive of asthma<br><u>Over 5 years</u><br>Findings in clinical history and examination that are suggestive of asthma <i>and</i> either spirometry demonstrating obstructive airflow and bronchodilator reversibility <i>or</i> a FeNO level of 35 ppb or more | <u>Over 5 years</u><br>Spirometry and bronchodilator reversibility <i>or</i> FeNO 1st line. Additional tests PEF, bronchial challenge test with histamine or methacholine              | Children who are not responding to treatment and cannot complete objective testing<br><br>If there is obstructive spirometry but negative bronchodilator reversibility and negative FeNO | When children have symptoms of asthma but normal objective testing results              | Repeated attacks, poor adherence and psychosocial problems                             |
| Global Initiative for Asthma (Global)(24) | 2021 | <u>6 years and over</u><br>Findings in clinical history that are suggestive of asthma <i>plus</i> evidence of variability in expiratory airflow limitation with either spirometry and bronchodilator reversibility, repeated PEF measurements, positive exercise challenge or positive bronchial challenge                                       | <u>6 years and over</u><br>Either spirometry, PEF, exercise challenge <i>or</i> bronchial challenge to detect variability in lung function                                             | Diagnostic uncertainty, previous life threatening attack, no/poor response to asthma treatment                                                                                           | Atypical asthma features, atypical clinical examination findings - e.g. cardiac murmurs | Multiple attacks, poor asthma symptom control, persistent variability in lung function |
| Canadian Thoracic Society (Canada)(33)    | 2021 | <u>Aged 1-5 years</u><br>More than one presentation of asthma like symptoms <i>plus</i> a response to asthma treatment trial<br><u>Over 6 years</u><br>Findings in clinical history that are suggestive of asthma <i>plus</i> spirometry showing obstructive expiration and demonstration                                                        | <u>Over 6 years</u><br>Spirometry and bronchodilator reversibility (1st line). Additional tests that may be useful - peak flow variability, bronchial challenge and exercise challenge | Diagnostic uncertainty, severe asthma, previous life threatening attack, need for allergy testing, any hospitalisation as a result of asthma                                             |                                                                                         | -                                                                                      |

|                                                        |      |                                                                                                                                                                                                                                                                                                                                                                         |                                                                                                                                                                                                                                           |                                                                                                               |                                                                                                                   |                                                                                                                                                                                                         |
|--------------------------------------------------------|------|-------------------------------------------------------------------------------------------------------------------------------------------------------------------------------------------------------------------------------------------------------------------------------------------------------------------------------------------------------------------------|-------------------------------------------------------------------------------------------------------------------------------------------------------------------------------------------------------------------------------------------|---------------------------------------------------------------------------------------------------------------|-------------------------------------------------------------------------------------------------------------------|---------------------------------------------------------------------------------------------------------------------------------------------------------------------------------------------------------|
|                                                        |      | of reversibility of airflow limitation of at least 12%                                                                                                                                                                                                                                                                                                                  |                                                                                                                                                                                                                                           |                                                                                                               |                                                                                                                   |                                                                                                                                                                                                         |
| National Asthma Council Australia (Australia)(31)      | 2021 | <u>Aged 1-5 years</u><br>Findings in clinical history and examination that are suggestive of asthma <i>plus</i> a response to treatment trial with SABA and/or ICS<br><u>6 years and over</u><br>Findings in clinical history and examination that are suggestive of asthma <i>plus</i> spirometry demonstration of reversibility of airflow limitation of at least 12% | <u>Aged 1-5 years</u><br>None<br><u>6 years and over</u><br>Spirometry 1st line. Bronchial challenge test and exercise testing to be considered if spirometry results does not show a reversibility of airflow limitation of at least 12% | When child has characteristic asthma symptoms and diagnosis is not clear from objective testing results       | Atypical asthma features<br>No response to treatment trials<br>Results of objective testing do not suggest asthma | -                                                                                                                                                                                                       |
| Asthma and Respiratory Foundation NZ (New Zealand)(32) | 2020 | <u>Aged 1-11</u><br>Findings in clinical history that are suggestive of asthma <i>plus</i> a response to asthma treatment trial                                                                                                                                                                                                                                         | <u>Aged 5-11 years</u><br>Spirometry should be considered if asthma symptoms are atypical or in those with typical asthma symptoms that do not respond to a treatment trial                                                               | When there is no response to asthma treatment trials and/or there is diagnostic uncertainty                   | Atypical asthma features                                                                                          | Monitor number of attacks in the last 12 months. Monitor health care use (excessive healthcare use suggests uncontrolled disease). Monitor medication use (more inhalers suggests uncontrolled disease) |
| Irish College of General Practitioners (Ireland)(34)   | 2020 | <u>Under 6 years</u><br>Findings in clinical history that are suggestive of asthma<br><u>Over 6 years</u><br>Findings in clinical history that are suggestive of asthma <i>plus</i> evidence of obstructive airflow limitation and reversibility with bronchodilators                                                                                                   | <u>Under 6 years</u><br>Treatment trial<br><u>Over 6 years</u><br>PEF or spirometry.                                                                                                                                                      | Parental concern or request, failure to respond to treatment trial, failure to thrive, diagnostic uncertainty |                                                                                                                   | Those with frequent unplanned health attendances/admissions and requiring excess medication such as inhalers frequently or oral steroids                                                                |
| The Japanese Society of Allergology (Japan)(29)        | 2020 | <u>All ages</u><br>Findings in clinical history that are suggestive of asthma <i>plus</i> a response to asthma treatment trial                                                                                                                                                                                                                                          | Lung function testing (non-specified), skin prick testing, bronchodilator reversibility testing, bronchial challenge                                                                                                                      | Poor response to multiple agent therapy or multiple courses of oral steroids                                  | Atypical asthma features, no response to treatment trial or atypical results on objective testing                 | Number of attacks in the last year, previous ICU admission for asthma, patient comorbidities                                                                                                            |

1  
2  
3  
4  
5  
6  
7  
8  
9  
10  
11  
12  
13  
14  
15  
16  
17  
18  
19  
20  
21  
22  
23  
24  
25  
26  
27  
28  
29  
30  
31  
32  
33  
34  
35  
36  
37  
38  
39  
40  
41  
42  
43  
44  
45  
46  
47

|                                                          |      |                                                                                                                                                                                                                                                                                                       |                                                                                                                                                                                                                                                                                                                                                   |                                                                                                                                                 |   |                                                  |
|----------------------------------------------------------|------|-------------------------------------------------------------------------------------------------------------------------------------------------------------------------------------------------------------------------------------------------------------------------------------------------------|---------------------------------------------------------------------------------------------------------------------------------------------------------------------------------------------------------------------------------------------------------------------------------------------------------------------------------------------------|-------------------------------------------------------------------------------------------------------------------------------------------------|---|--------------------------------------------------|
| International Consensus on Pediatric Asthma (Global)(26) | 2015 | <u>Under 5 years</u><br>Findings in clinical history that are suggestive of asthma<br><u>Over 5 years</u><br>Findings in clinical history that are suggestive of asthma <i>plus</i> spirometry with bronchodilator reversibility demonstration of reversibility of airflow limitation of at least 12% | <u>Over 5 years</u><br>Spirometry 1 <sup>st</sup> line. PEF is useful for aiding. FeNO and skin prick testing for detecting allergic asthma can be useful.                                                                                                                                                                                        |                                                                                                                                                 |   |                                                  |
| GEMA (Spain)(25)                                         | 2009 | <u>Under 6 years</u><br>Findings in clinical history that are suggestive of asthma<br><u>Over 6 years</u><br>Findings in clinical history that are suggestive of asthma <i>plus</i> spirometry with bronchodilator reversibility demonstration of reversibility of airflow limitation of at least 12% | <u>6 years and over</u><br>Spirometry with combined bronchodilator reversibility. FeNO and allergy testing may be useful if diagnosis is unclear                                                                                                                                                                                                  |                                                                                                                                                 |   | Poor asthma symptom control and frequent attacks |
| Ministry of Health (Singapore)(28)                       | 2008 | <u>All ages</u><br>Findings in clinical history and examination that are suggestive of asthma                                                                                                                                                                                                         | No objective testing normally required for diagnosis. PEF at every consultation and spirometry at least annually in children over 6 years to assess asthma severity.<br>Tests that may be considered - CXR to exclude foreign bodies and chronic LRTIs, skin prick testing to detect atopy and exercise testing to assess exercise induced asthma | High risk patients with poor control, young age and poor response to treatment trial, when requiring high doses of steroids to control symptoms | - | -                                                |

## MANAGEMENT OF ASTHMA IN CHILDREN

The management of asthma is multifactorial and to optimise disease control a number of pharmacological, non-pharmacological and self-management aspects need to be considered.

### 1. Pharmacological management

The pharmacological management of asthma involves two key components; maintenance and reliever therapies. Maintenance therapies are the mainstay of asthma management and the treatment aim is that no reliever therapies are required. Use of reliever therapy suggests asthma control is poor.

An overview of maintenance and reliever therapies is outlined in Tables 5 and 6 respectively. A stepwise approach to asthma management is encouraged and pharmacological management varies on age, symptom control and the national guideline used. An overview of management approach in a number of national guidelines is summarised in Table 7.

GINA guidelines recommend dual ICS and short-acting beta-2 agonist (SABA) therapy to children over the age of 5(24). SABA monotherapy was previously the main management starting point, however compared with combined treatment, SABA monotherapy has been shown to be associated with asthma mortality(35). SABA monotherapy is now only recommended by GINA for use in children aged 5 or less(24).

Single Maintenance and Reliever Therapy (SMART) inhalers are combined inhalers offering both maintenance and reliever therapy in those with asthma. These inhalers contain a number of maintenance and reliever therapies in different combinations. The use of these inhalers have been shown to reduce the risk of asthma attacks and ED admissions(36), improve lung function and decrease the need for reliever therapy(37). There is limited evidence in the effectiveness of SMART inhalers in children, however



children over 12 years may be prescribed a SMART inhaler, which acts as both a maintenance and reliever therapy, if symptoms are not well controlled(38).

**Table 5. Maintenance therapies**

| Maintenance therapies                                       | Comments                                                                                                                                                                                                                                                                                                                    |
|-------------------------------------------------------------|-----------------------------------------------------------------------------------------------------------------------------------------------------------------------------------------------------------------------------------------------------------------------------------------------------------------------------|
| Inhaled corticosteroids (ICS)                               | Currently used as a first line maintenance agent in a number of national guidelines(21, 24, 32, 34). When using ICS, the lowest possible dose to effectively control symptoms should be used to prevent possible adverse effects of reduced growth and risk of adrenal suppression.                                         |
| Long-acting beta-2 agonists (LABA)                          | Used as an add on therapy when dual ICS and SABA (short-acting beta-2 agonists) therapy is ineffective. In comparison to SABA, bronchodilation duration is prolonged to 12 hours.                                                                                                                                           |
| Leukotriene receptor antagonists (LTRA) (e.g. montelukast)  | Used as an add on therapy in those who have poor symptom control despite ICS and LABA treatments(21, 24, 25, 29, 31, 33).<br><br>There have been a number of concerns raised regarding possible adverse reactions to montelukast. These include neuropsychiatric features ranging from poor sleep to suicidal ideation(39). |
| Long-acting muscarinic antagonists (LAMA) (e.g. tiotropium) | Used as an add on therapy in those who have poor symptoms control despite ICS and LABA therapies.                                                                                                                                                                                                                           |
| Oral theophylline                                           | Used as an add on therapy, usually in those with uncontrolled symptoms despite several maintenance and reliever therapies.<br><br>Monitoring of plasma level required on initiation of treatment and dose changes.                                                                                                          |

|           |                                                                                                                                                                                                                                                                                                                                               |
|-----------|-----------------------------------------------------------------------------------------------------------------------------------------------------------------------------------------------------------------------------------------------------------------------------------------------------------------------------------------------|
| Biologics | Use as an add on therapy, under specialist care, in those who have poorly controlled symptoms despite being on several maintenance and reliever therapies. A number of biologic agents are available (Table 8). Various individual biologics have been shown to reduce attacks, improve lung function and reduce oral corticosteroid use(19). |
|-----------|-----------------------------------------------------------------------------------------------------------------------------------------------------------------------------------------------------------------------------------------------------------------------------------------------------------------------------------------------|

**Table 6. Reliever therapies**

| Reliever therapies                  | Comments                                                                                                                                                                                                                                                           |
|-------------------------------------|--------------------------------------------------------------------------------------------------------------------------------------------------------------------------------------------------------------------------------------------------------------------|
| Short-acting beta-2 agonists (SABA) | <p>Currently used as a first line reliever agent in a number of national guidelines. Effects of bronchodilation last for up to 4 hours.</p> <p>SABAs work by rapidly relaxing the smooth muscle of small airways, providing quick relief from asthma symptoms.</p> |
| Oral corticosteroids                | Used as a short-term therapy during asthma attacks to reduce airway inflammation and ease symptoms. Repeated short-term courses of oral steroids suggest poor chronic symptom control and should trigger a review of maintenance therapy.                          |

## 2. Non-pharmacological management

Non-pharmacological aspects of asthma management include providing education on modifiable risk factors and comorbidities to caregivers and conducting annual asthma reviews to assess control and future risk.

1  
2  
3 Education is key to improving caregiver and child understanding of asthma and its  
4 management. Clear information regarding modifiable risk factors, such as smoke  
5 exposure, domestic pollutants and obesity, should be given. Short term educational  
6 interventions aimed to improve self-management have been shown to increase  
7 medication adherence(40), improved symptom control and reduced mortality(41).  
8  
9

10  
11  
12  
13 All young people with asthma should have asthma reviews at least annually. These  
14 reviews should focus on current symptom control and management, previous attacks,  
15 triggers, modifiable risk factors and personal asthma action plans (PAAPs). Asthma  
16 reviews are opportunities to assess child and caregiver understanding of asthma and  
17 provide education if necessary.  
18  
19  
20  
21  
22  
23  
24  
25

### 26 **3. Self-management**

27  
28

29 Self-management aspects of paediatric asthma management include asthma education  
30 and PAAPs. PAAPs are written documents that are given to young people and/or  
31 caregivers that advise them on day to day asthma management and what to do in the  
32 event of an attack(42). Action plans should be created with patient/caregiver input, shared  
33 with relevant individuals (e.g. school teachers) and should be reviewed and updated  
34 regularly. PAAPs have been shown to reduce ED attendance, missed school days and  
35 increase caregiver confidence when managing attacks(43). The 2018 Annual Asthma  
36 Survey found that over 50% of children with asthma in the United Kingdom had no PAAP  
37 and around 20% of caregivers did not seek medical advice during acute asthma attacks,  
38 highlighting large gaps in education(44).  
39  
40  
41  
42  
43  
44  
45  
46  
47  
48  
49  
50  
51  
52  
53  
54  
55  
56  
57  
58  
59  
60

**Table 7. Summary of paediatric asthma national guidelines – focusing on management**

| Guideline                                 | Year | 1st line management                                                                                                                                                                   | Add on therapies*                                                                                                                                                                                                                                                                                                                                                                                                                                                                                                                                                  | Treatment withdrawal                                                                                                                       |
|-------------------------------------------|------|---------------------------------------------------------------------------------------------------------------------------------------------------------------------------------------|--------------------------------------------------------------------------------------------------------------------------------------------------------------------------------------------------------------------------------------------------------------------------------------------------------------------------------------------------------------------------------------------------------------------------------------------------------------------------------------------------------------------------------------------------------------------|--------------------------------------------------------------------------------------------------------------------------------------------|
| NICE Guidelines (United Kingdom)(21)      | 2017 | <u>Aged 1-4 years</u><br>SABA monotherapy<br><u>Aged 5-16 years</u><br>SABA monotherapy                                                                                               | <u>Aged 1-4 years</u><br>2nd line - low dose ICS<br>3rd line - low dose ICS and LTRA<br>4th line - referral to paediatrics for specialist management<br><u>Aged 5-16 years</u><br>2nd line - low dose ICS<br>3rd line - low dose ICS and LTRA<br>4th line - low dose ICS and LABA<br>5th line - high dose ICS and LABA<br>6th line - referral to paediatrics for specialist management                                                                                                                                                                             | Consider withdrawing maintenance treatment after 3 months of stable asthma. Only consider stopping ICS on those who are on ICS monotherapy |
| Global Initiative for Asthma (Global)(24) | 2021 | <u>Aged 5 years and under</u><br>SABA monotherapy<br><u>Aged 6-11 years</u><br>Combined low dose ICS+SABA (as needed)<br><u>Adolescents</u><br>Combined low dose ICS+SABA (as needed) | <u>5 years and under</u><br>2nd line - low dose ICS<br>3rd line - medium dose ICS <i>or</i> low dose ICE and LTRA<br>4th line - refer to paediatrics for expert advice<br><u>Aged 6-11 years</u><br>2nd line - low dose ICS<br>3rd line - low dose ICS and LABA <i>or</i> medium dose ICS <i>or</i> daily SMART combined ICS/LABA. Refer for expert advice<br>4th line - refer for phenotype assessment<br><u>Adolescents</u><br>2nd line - low dose ICS<br>3rd line - medium dose ICS<br>4th line - medium/high dose ICS +/- LAMA. Refer for phenotype assessment | Stepping down treatment should be considered when both asthma symptoms and lung function have been stable for a period of 3 months or more |
| Canadian Thoracic Society (Canada)(33)    | 2021 | <u>Aged 1-5 years</u><br>SABA monotherapy<br><u>Aged 6 -11</u><br>SABA monotherapy<br><u>Age 12+</u><br>SABA monotherapy                                                              | <u>Aged 1-5 years</u><br>2nd line – ICS and LTRA<br>3rd line - high dose ICS and LTRA<br>4 <sup>th</sup> line - referral to paediatrics for specialist management<br><u>Aged 6 -11</u><br>2nd line - ICS and LTRA<br>3rd line - high dose ICS and LTRA<br>4th line - high dose ICS, LTRA and LABA<br>5th line - high dose ICS, LTRA, LABA and oral steroids<br><u>Age 12+</u><br>2nd line – ICS and LTRA<br>3rd line – ICS, LTRA and LABA<br>4th line - high dose ICS, LTRA, LABA and tiotropium                                                                   | After asthma has been well controlled for a period of 3-6 months                                                                           |

|                                                        |      |                                                                                                                                                                                      |                                                                                                                                                                                                                                                                                                                                                                                                                                                                                                                                    |                                                                                                                       |
|--------------------------------------------------------|------|--------------------------------------------------------------------------------------------------------------------------------------------------------------------------------------|------------------------------------------------------------------------------------------------------------------------------------------------------------------------------------------------------------------------------------------------------------------------------------------------------------------------------------------------------------------------------------------------------------------------------------------------------------------------------------------------------------------------------------|-----------------------------------------------------------------------------------------------------------------------|
| National Asthma Council Australia (Australia)(31)      | 2021 | <u>Aged 1-5 years</u><br>SABA monotherapy<br><u>Aged 6 and over</u><br>SABA monotherapy                                                                                              | <u>Age 1-5 years</u><br>2nd line - low dose ICS <i>or</i> LTRA<br>3rd line - low dose ICS and LTRA<br>4th line - referral to paediatrics for specialist management<br><u>Age 6 and over</u><br>2nd line - low dose ICS <i>or</i> LTRA<br>3rd line - low dose ICS and LTRA <i>or</i> high dose ICS <i>or</i> ICS/LABA combination<br>4th line - referral to paediatrics for specialist management                                                                                                                                   | Step down of treatment should be considered when symptoms have been well controlled for a period of at least 6 months |
| Asthma and Respiratory Foundation NZ (New Zealand)(32) | 2020 | <u>Aged 1-4 years</u><br>SABA and low dose ICS<br><u>Aged 5-11 years</u><br>SABA monotherapy                                                                                         | <u>Age 1-4 years</u><br>2nd line - low dose ICS and LTRA<br>3rd line - referral to paediatrics for specialist management<br><u>Age 5-11 years</u><br>2nd line – SABA and low dose ICS<br>3rd line – LABA and low dose ICS<br>4th line - LABA, high dose ICS, LTRA and referral to paediatrics for specialist management                                                                                                                                                                                                            | If child has been stable for 3 months or more on treatment, step down with an incremental approach                    |
| Irish College of General Practitioners (Ireland)(34)   | 2020 | <u>Aged 6-11</u><br>ICS and SABA (ICS only to be taken when SABA is used as a reliever)<br><u>Adolescents</u><br>ICS and SABA (ICS only to be taken when SABA is used as a reliever) | <u>Aged 6-11</u><br>2nd line – low dose ICS <i>or</i> LTRA (if ICS is not appropriate)<br>3rd line - low dose ICS and LABA <i>or</i> high dose ICS<br>4th line - medium dose ICS, LABA and referral to paediatrics for management advice<br>5th line - refer to paediatrics for phenotype assessment<br><u>Adolescents</u><br>2nd line – low dose ICS<br>3rd line - low dose ICS and LABA<br>4th line - medium dose ICS and LABA <i>or</i> low dose ICS, LABA and LAMA<br>5th line - refer to paediatrics for phenotype assessment |                                                                                                                       |
| The Japanese Society of Allergology (Japan)(29)        | 2020 | <u>Aged 1-5 years</u><br>SABA monotherapy<br><u>Aged 6-15 years</u><br>SABA monotherapy                                                                                              | <u>Age 1-5 years</u><br>2nd line - low dose ICS <i>or</i> LTRA <i>or</i> Disodium cromoglycate (DSCG)<br>3rd line - medium dose ICS<br>4th line - high dose ICS and LTRA<br><u>Age 6-15 years</u><br>2nd line - low dose ICS <i>or</i> LTRA<br>3rd line - medium dose ICS <i>or</i> combined low dose ICS/LABA<br>4th line - high dose ICS <i>or</i> combined medium dose ICS/LABA                                                                                                                                                 | -                                                                                                                     |
| International Consensus on Pediatric                   | 2015 | Quotes GINA and NICE guidelines                                                                                                                                                      | Quotes GINA and NICE guidelines                                                                                                                                                                                                                                                                                                                                                                                                                                                                                                    |                                                                                                                       |

|                                                            |      |                                                                                                 |                                                                                                                                                                                                                                                                                                                                                                                                                                                                                                                                                                                                                                                       |                                                                                                                                                              |
|------------------------------------------------------------|------|-------------------------------------------------------------------------------------------------|-------------------------------------------------------------------------------------------------------------------------------------------------------------------------------------------------------------------------------------------------------------------------------------------------------------------------------------------------------------------------------------------------------------------------------------------------------------------------------------------------------------------------------------------------------------------------------------------------------------------------------------------------------|--------------------------------------------------------------------------------------------------------------------------------------------------------------|
| Asthma<br>(Global)(26)                                     |      |                                                                                                 |                                                                                                                                                                                                                                                                                                                                                                                                                                                                                                                                                                                                                                                       |                                                                                                                                                              |
| GEMA<br>(Spain)(25)                                        | 2009 | <u>Aged 3 and under</u><br>SABA<br>monotherapy<br><u>Aged 3 and over</u><br>SABA<br>monotherapy | <u>Aged 3 and under</u><br>2nd line - low dose ICS <i>or</i> LTRA<br>3rd line - moderate dose ICS <i>or</i> low dose ICS and LTRA<br>4th line - moderate dose ICS and LTRA<br>5th line - high dose ICS and LTRA. Consider adding LABA<br>6th line - oral steroids<br><u>Aged 3 and under</u><br>2nd line - low dose ICS <i>or</i> LTRA<br>3rd line - moderate dose ICS <i>or</i> low dose ICS and LTRA <i>or</i> low dose ICS and LABA<br>4th line - moderate dose ICS and LTRA <i>or</i> moderate dose ICS and LABA<br>5th line - high dose ICS and LABA. Consider adding LTRA and theophyllines<br>6th line – consider oral steroids and omalizumab |                                                                                                                                                              |
| Ministry of<br>Health<br>(Singapore)(28)                   | 2008 | No stepwise<br>approach outlined                                                                | No stepwise approach outlined                                                                                                                                                                                                                                                                                                                                                                                                                                                                                                                                                                                                                         | Consider stepping<br>down treatment when<br>symptoms are stable<br>for 3 to 6 months<br>considering the child's<br>risk of poor outcomes.<br>Do not stop ICS |
| South African<br>Thoracic<br>Society (South<br>Africa)(45) | 2007 | <u>Adolescents</u><br>SABA + low dose<br>ICS                                                    | <u>Adolescents</u><br>2nd line – LABA and ICS<br>3rd line - LABA, low dose ICS and LTRA/LABA <i>or</i> high dose ICS <i>or</i> LABA, low dose<br>ICS and theophyllines. Consider oral corticosteroids<br>4th line - referral to specialist                                                                                                                                                                                                                                                                                                                                                                                                            | -                                                                                                                                                            |

\*SABA reliever therapy as required at any stage

**Table 8. Biologic agents used in the management of asthma**

| <b>Biologic</b> | <b>Route and frequency</b>                                               | <b>Mechanism of action</b>                                                                                                                                                                                                                           | <b>Effect on asthma symptoms</b>                 | <b>Effect on attacks and mortality</b> | <b>Safety concerns/Common adverse reactions</b>                                                           |
|-----------------|--------------------------------------------------------------------------|------------------------------------------------------------------------------------------------------------------------------------------------------------------------------------------------------------------------------------------------------|--------------------------------------------------|----------------------------------------|-----------------------------------------------------------------------------------------------------------|
| Omalizumab      | S/C injection every 4 weeks                                              | IgG1 <sub>κ</sub> antibody that binds to the Fc portion of IgE, resulting in the inability of IgE to bind to the IgE receptor on mast cells(46). This reduces the concentration of free circulating IgE and consequently mast cell degranulation(47) | Improved asthma symptoms(48)                     | Reduce asthma attacks(48, 49)          | Mild injection site reactions, headache, pyrexia, abdominal pain, gastroenteritis and nasopharyngitis(50) |
| Dupilumab       | S/C injection every 2 weeks                                              | Binds to alpha component of IL-4 receptor blocking IL-4 and IL-13 stimulation of B-cells(51)                                                                                                                                                         | Improved asthma symptoms and quality of life(52) | Reduced asthma attacks(53)             | Mild injection site reactions and eosinophilia(53)                                                        |
| Mepolizumab     | S/C injection every 4 weeks                                              | Binds to IL-5 cytokines resulting in reduced peripheral eosinophilia and reduced airway inflammation(54)                                                                                                                                             | Improved asthma symptoms and quality of life(55) | Reduced asthma attacks(55, 56)         | Headache, attack of asthma symptoms and bronchitis(57, 58)                                                |
| Reslizumab      | IV infusion every 4 weeks                                                | Binds to IL-5 cytokines resulting in reduced peripheral eosinophilia and reduced airway inflammation(54)                                                                                                                                             | Improved asthma symptoms and quality of life(59) | Reduced asthma attacks(59)             | Attack of asthma symptoms, nasopharyngitis and upper respiratory tract infections(60)                     |
| Benralizumab    | S/C injection every 4 weeks for the first 3 doses and then every 8 weeks | Binds to alpha component of IL-5 receptor resulting in reduced eosinophil activation from IL-5(61)                                                                                                                                                   | Improved asthma symptoms and quality of life(62) | Reduced asthma attacks(62)             | Headache, sinusitis, nasopharyngitis and pyrexia(62)                                                      |

## Withdrawing management/stepping down

Asthma control should be reviewed at every medical contact. When asthma symptoms are well controlled on pharmacological therapy, stopping or stepping down medication should be considered to protect young people from unnecessary adverse effects.

The GINA 2021 guidelines advise that clinicians should consider stepping down asthma management to the lowest effective treatment regimen when good symptom control has been achieved for at least 3 months(24). When stepping down treatment an individualised risk-benefit approach should be taken with focus on the child's medical history including frequency of oral corticosteroid use, frequency of asthma attacks and previous intensive or high dependency care admissions(63).

## WHEN TO REFER TO A SPECIALIST

Most paediatric asthma cases are diagnosed in primary care without the input of general paediatricians or paediatric respiratory physicians(5). However, a number of children with asthma may need to be referred to specialists for diagnostic or management input. Common indications for specialist referral include no or poor response to asthma treatments, inconclusive objective testing, poor symptom control with appropriate treatment, frequent oral corticosteroid use or the occurrence of a severe asthma attack(21, 24, 29, 31, 32, 34).

Health care professionals must consider any safeguarding implications at all paediatric asthma reviews as part of delivering holistic care. Unexplained or frequent 'do not attend' appointments or suspicion of poor medical management at home should be flagged and acted upon locally.



## PREDICTORS OF LIFE-THREATENING ATTACKS

The following features have been shown to increase the likelihood of future severe attacks and particular attention should be given to these factors during asthma reviews.

1. Previous attack: The strongest risk factor for a future asthma attack is a personal history of a previous attack. One large systematic review and meta-analysis found that children with a recent history of ED attendance with an asthma attack were up to 5.8 times more likely to have another ED attendance and up to 3 times more likely to be admitted to hospital with a future asthma attack(64).
2. Frequent SABA use and prescription requests: Frequent use of SABA reliever therapy suggests poor control of asthma symptoms. If asthma symptoms are well controlled, no more than two SABA inhalers should be required annually(65). The UK NRAD found that excess SABA prescription and use was prominent in individuals who died of asthma attacks. For those with data available, around 40% had been prescribed 12 or more SABA inhalers in the 12 months before death(5).

## POST-ATTACK REVIEW

Asthma attacks should be viewed as never events. It is essential that a post-attack review is conducted to review asthma maintenance treatment, as this is likely to be suboptimal. Failure to review patients post-attack, and alter treatment where appropriate, is likely to predispose to future attacks, which could be life-threatening. Management of the current attack should be reviewed to ensure treatment is appropriate and symptoms are resolving. Some individuals may require additional courses of oral corticosteroids to settle symptoms(6).

Current NICE quality standards (UK) state that all individuals hospitalised with an asthma attack should receive a follow up review in primary care within 2 working days of

1  
2  
3 discharge(21), to review maintenance management and ensure resolution of symptoms.  
4  
5 However, the 2018 National Asthma Survey completed in the UK found that 64% of  
6  
7 respondents had no primary care follow up post-attack and most patients were not aware  
8  
9 that this was required(44).

### 10 11 12 13 **Salbutamol weaning**

14  
15  
16  
17 Salbutamol weaning plans are commonly used by a number of healthcare organisations  
18 following discharge after an asthma attack. These plans direct caregivers to provide  
19 regular SABA therapy, often in a reducing regime, in the days following discharge. There  
20 have been a number of concerns raised with regards to these plans with some believing  
21 that providing regular SABA therapy may potentially mask deterioration and could delay  
22 care givers seeking medical advice(66). Healthcare professionals should enquire about  
23 salbutamol weaning plans during post-attack reviews and urge caregivers to seek medical  
24 advice if they have concerns or the effects of SABA are not lasting the 4 hours of duration.  
25  
26  
27  
28  
29  
30  
31  
32  
33

### 34 **FUTURE DEVELOPMENTS IN CARE**

35  
36  
37 The management of paediatric asthma is changing over time with, just as two examples,  
38 developments in technology and service structure.  
39  
40  
41  
42

- 43 1. Technology. The growing use of technology in asthma care has huge potential to  
44 improve clinical outcomes. Smartphone applications can be used to provide  
45 medication reminders to users and this has been shown to increase ICS  
46 adherence(67). Applications can also be used to provide educational content to young  
47 people and care givers(68), as well as store personal asthma action plans(69). 'Smart'  
48 inhalers, not to be confused with SMART inhalers, are devices that can provide audio  
49 reminders to users and record when they are used. One paediatric study found that  
50  
51  
52  
53  
54  
55  
56  
57  
58  
59  
60

1  
2  
3 the use of 'smart' inhalers increased treatment adherence to 84%, compared to 30%  
4 in the control group(70).  
5  
6  
7

- 8  
9 2. Diagnostic hubs. In the UK, regional diagnostic hubs for asthma care have been  
10 recommended in NHS England's Long Term Plan(71). Implementation of diagnostic  
11 hubs is hoped to result in earlier and more accurate asthma diagnoses by improving  
12 access to objective testing and specialised interpretation. Hubs are designed to  
13 improve asthma outcomes by enabling most appropriate treatment initiation and  
14 monitoring. There is currently no evidence in the literature of the clinical effects of  
15 diagnostic hubs being used in the management of paediatric asthma.  
16  
17  
18  
19  
20  
21  
22  
23

## 24 **CONCLUSIONS**

25  
26  
27 Paediatric asthma outcomes are currently poor and many deaths are preventable. The  
28 aim should be to avoid asthma attacks occurring with appropriate maintenance therapy  
29 and they should be viewed as never events. In order to improve outcomes, accurate  
30 diagnosis and management are essential. Good asthma care extends beyond providing  
31 medication and should include education, as well as supported self-management advice.  
32 The use of PAAPs remains poor and a significant number of young people with asthma  
33 do not have one. Post-attack asthma reviews are a key opportunity to review maintenance  
34 medication and current symptom control.  
35  
36  
37  
38  
39  
40  
41  
42  
43  
44  
45  
46  
47  
48  
49  
50  
51  
52  
53  
54  
55  
56  
57  
58  
59  
60

## KEY MESSAGES

1. Paediatric asthma outcomes are poor and many deaths are preventable
2. Diagnosing asthma in childhood can be challenging and the diagnosis should be reviewed during follow up to ensure it is correct
3. Asthma attacks should be viewed as never events. Post-attack reviews are essential to optimise maintenance therapy and prevent future attacks
4. Education is key to improving asthma outcomes
5. Personalised Asthma Action Plans are essential and a significant number of children with asthma do not have one

1  
2  
3  
4  
5  
6  
7  
8  
9  
10  
11  
12  
13  
14  
15  
16  
17  
18  
19  
20  
21  
22  
23  
24  
25  
26  
27  
28  
29  
30  
31  
32  
33  
34  
35  
36  
37  
38  
39  
40  
41  
42  
43  
44  
45  
46  
47  
48  
49  
50  
51  
52  
53  
54  
55  
56  
57  
58  
59  
60

**COMPETING INTERESTS**

MB received investigator-led research grants from Pfizer and Roche Diagnostics; speaker fees paid to Newcastle University from Novartis, Roche Diagnostics and TEVA. Travel expenses to educational meetings Boehringer Ingelheim and Vertex Pharmaceuticals. JM and JT: none

Confidential: For Review Only

## REFERENCES

1. Zar HJ, Ferkol TW. The global burden of respiratory disease-impact on child health. *Pediatr Pulmonol*. 2014;49(5):430-4.
2. Fleming M, Fitton CA, Steiner MFC, McLay JS, Clark D, King A, et al. Educational and health outcomes of children treated for asthma: Scotland-wide record linkage study of 683716 children. *European Respiratory Journal*. 2019;54(3):1802309.
3. Nichols M, Miller S, Treiber F, Ruggiero K, Dawley E, Teufel li R. Patient and Parent Perspectives on Improving Pediatric Asthma Self-Management Through a Mobile Health Intervention: Pilot Study. *JMIR Form Res*. 2020;4(7):e15295.
4. FitzGerald JM, Barnes PJ, Chipps BE, Jenkins CR, O'Byrne PM, Pavord ID, et al. The burden of exacerbations in mild asthma: a systematic review. *ERJ Open Res*. 2020;6(3).
5. Physicians RCo. The National Review of Asthma Deaths (NRAD). 2014.
6. Bush A, Pavord I. The Lancet Asthma Commission: treating children in primary care. *Prescriber*. 2018;29:28-32.
7. McCormack MC, Enright PL. Making the diagnosis of asthma. *Respir Care*. 2008;53(5):583-90; discussion 90-2.
8. Kuruvilla ME, Lee FE, Lee GB. Understanding Asthma Phenotypes, Endotypes, and Mechanisms of Disease. *Clin Rev Allergy Immunol*. 2019;56(2):219-33.
9. Michel G, Silverman M, Strippoli MP, Zwahlen M, Brooke AM, Grigg J, et al. Parental understanding of wheeze and its impact on asthma prevalence estimates. *Eur Respir J*. 2006;28(6):1124-30.
10. Fainardi V, Santoro A, Caffarelli C. Preschool Wheezing: Trajectories and Long-Term Treatment. *Frontiers in Pediatrics*. 2020;8.
11. Townshend J, Hails S, McKean M. Diagnosis of asthma in children. *Bmj*. 2007;335(7612):198-202.
12. Gautier C, Charpin D. Environmental triggers and avoidance in the management of asthma. *J Asthma Allergy*. 2017;10:47-56.
13. Win PH, Hussain I. Asthma Triggers: What Really Matters? *Clinical Asthma*. 2008:149-56.

14. Tarasidis GS, Wilson KF. Diagnosis of asthma: clinical assessment. *Int Forum Allergy Rhinol.* 2015;5 Suppl 1:S23-6.
15. Been JV, Lugtenberg MJ, Smets E, van Schayck CP, Kramer BW, Mommers M, et al. Preterm birth and childhood wheezing disorders: a systematic review and meta-analysis. *PLoS Med.* 2014;11(1):e1001596.
16. Mu M, Ye S, Bai MJ, Liu GL, Tong Y, Wang SF, et al. Birth weight and subsequent risk of asthma: a systematic review and meta-analysis. *Heart Lung Circ.* 2014;23(6):511-9.
17. Egan KB, Ettinger AS, Bracken MB. Childhood body mass index and subsequent physician-diagnosed asthma: a systematic review and meta-analysis of prospective cohort studies. *BMC Pediatr.* 2013;13:121.
18. Licari A, Castagnoli R, Brambilla I, Marseglia A, Tosca MA, Marseglia GL, et al. Asthma Endotyping and Biomarkers in Childhood Asthma. *Pediatr Allergy Immunol Pulmonol.* 2018;31(2):44-55.
19. McGregor MC, Krings JG, Nair P, Castro M. Role of Biologics in Asthma. *Am J Respir Crit Care Med.* 2019;199(4):433-45.
20. Kavanagh J, Jackson DJ, Kent BD. Over- and under-diagnosis in asthma. *Breathe (Sheff).* 2019;15(1):e20-e7.
21. (NICE) NifHaCE. Asthma: diagnosis, monitoring and chronic asthma management. <https://www.nice.org.uk/guidance/ng80/resources/asthma-diagnosis-monitoring-and-chronic-asthma-management-pdf-18376879756212017>; 2021.
22. Ullmann N, Mirra V, Di Marco A, Pavone M, Porcaro F, Negro V, et al. Asthma: Differential Diagnosis and Comorbidities. *Front Pediatr.* 2018;6:276.
23. Townshend J, Hails S, McKean M. Management of asthma in children. *Bmj.* 2007;335(7613):253-7.
24. Asthma Gif. Global Strategy for Asthma Management and Prevention. <https://ginasthma.org/gina-reports/>; 2021.
25. Plaza Moral V, Alonso Mostaza S, Alvarez Rodríguez C, Gomez-Outes A, Gómez Ruiz F, López Vina A, et al. SPANISH GUIDELINE ON THE MANAGEMENT OF ASTHMA. *Journal of Investigational Allergology and Clinical Immunology.* 2016;26 Suppl 1(Suppl 1):1-92.

- 1  
2  
3 26. Papadopoulos NG, Arakawa H, Carlsen KH, Custovic A, Gern J, Lemanske R, et  
4 al. International consensus on (ICON) pediatric asthma. *Allergy*. 2012;67(8):976-97.  
5
- 6 27. Berry M, Morgan A, Shaw DE, Parker D, Green R, Brightling C, et al.  
7 Pathological features and inhaled corticosteroid response of eosinophilic and non-  
8 eosinophilic asthma. *Thorax*. 2007;62(12):1043-9.  
9
- 10 28. Health SMO. Management of asthma  
11 [https://www.moh.gov.sg/docs/librariesprovider4/guidelines/cpg\\_asthma.pdf2008](https://www.moh.gov.sg/docs/librariesprovider4/guidelines/cpg_asthma.pdf2008); 2008.  
12
- 13 29. Arakawa H, Adachi Y, Ebisawa M, Fujisawa T. Japanese guidelines for childhood  
14 asthma 2020. *Allergol Int*. 2020;69(3):314-30.  
15
- 16 30. Devonshire AL, Kumar R. Pediatric asthma: Principles and treatment. *Allergy*  
17 *Asthma Proc*. 2019;40(6):389-92.  
18
- 19 31. Australia TNAC. Australian Asthma Handbook.  
20 [https://www.nationalasthma.org.au/health-professionals/australian-asthma-](https://www.nationalasthma.org.au/health-professionals/australian-asthma-handbook2021)  
21 [handbook2021](https://www.nationalasthma.org.au/health-professionals/australian-asthma-handbook2021); 2021.  
22
- 23 32. Zealand AaRFN. New Zealand Child Asthma Guidelines: a quick reference  
24 guide. <https://www.asthmafoundation.org.nz/resources/nz-child-asthma-guidelines2020>;  
25 2020.  
26
- 27 33. Yang CL, Hicks EA, Mitchell P, Reisman J, Podgers D, Hayward KM, et al.  
28 Canadian Thoracic Society 2021 Guideline update: Diagnosis and management of  
29 asthma in preschoolers, children and adults. *Canadian Journal of Respiratory, Critical*  
30 *Care, and Sleep Medicine*. 2021;5(6):348-61.  
31
- 32 34. Dermot Nolan DM. Asthma - Diagnosis, Assessment and Management in  
33 General Practice Quick Reference Guide.  
34 [https://www.icgp.ie/speck/properties/asset/asset.cfm?type=LibraryAsset&id=B913F962](https://www.icgp.ie/speck/properties/asset/asset.cfm?type=LibraryAsset&id=B913F962%2DC2B7%2D4C24%2D817B66C37E2F8A90&property=asset&revision=tip&disposition=inline&app=icgp&filename=Asthma%5F%2D%5FDiagnosis%5F%5FAssessment%5Fand%5FManagement%5Fin%5FGeneral%5FPractice%5FQRG%2Epdf)  
35 [%2DC2B7%2D4C24%2D817B66C37E2F8A90&property=asset&revision=tip&dispositio](https://www.icgp.ie/speck/properties/asset/asset.cfm?type=LibraryAsset&id=B913F962%2DC2B7%2D4C24%2D817B66C37E2F8A90&property=asset&revision=tip&disposition=inline&app=icgp&filename=Asthma%5F%2D%5FDiagnosis%5F%5FAssessment%5Fand%5FManagement%5Fin%5FGeneral%5FPractice%5FQRG%2Epdf)  
36 [n=inline&app=icgp&filename=Asthma%5F%2D%5FDiagnosis%5F%5FAssessment%5F](https://www.icgp.ie/speck/properties/asset/asset.cfm?type=LibraryAsset&id=B913F962%2DC2B7%2D4C24%2D817B66C37E2F8A90&property=asset&revision=tip&disposition=inline&app=icgp&filename=Asthma%5F%2D%5FDiagnosis%5F%5FAssessment%5Fand%5FManagement%5Fin%5FGeneral%5FPractice%5FQRG%2Epdf)  
37 [and%5FManagement%5Fin%5FGeneral%5FPractice%5FQRG%2Epdf](https://www.icgp.ie/speck/properties/asset/asset.cfm?type=LibraryAsset&id=B913F962%2DC2B7%2D4C24%2D817B66C37E2F8A90&property=asset&revision=tip&disposition=inline&app=icgp&filename=Asthma%5F%2D%5FDiagnosis%5F%5FAssessment%5Fand%5FManagement%5Fin%5FGeneral%5FPractice%5FQRG%2Epdf).  
38
- 39 35. Suissa S, Ernst P, Benayoun S, Baltzan M, Cai B. Low-dose inhaled  
40 corticosteroids and the prevention of death from asthma. *N Engl J Med*.  
41 2000;343(5):332-6.  
42  
43  
44  
45  
46  
47  
48  
49  
50  
51  
52  
53  
54  
55  
56  
57  
58  
59  
60



- 1  
2  
3 36. Scicchitano R, Aalbers R, Ukena D, Manjra A, Fouquert L, Centanni S, et al.  
4 Efficacy and safety of budesonide/formoterol single inhaler therapy versus a higher  
5 dose of budesonide in moderate to severe asthma. *Curr Med Res Opin*.  
6  
7 2004;20(9):1403-18.  
8  
9  
10 37. Sobieraj D, Weeda E, Nguyen E, Coleman C, White C, Lazarus S, et al.  
11 Association of Inhaled Corticosteroids and Long-Acting  $\beta$ -Agonists as Controller and  
12 Quick Relief Therapy With Exacerbations and Symptom Control in Persistent Asthma: A  
13 Systematic Review and Meta-analysis. *JAMA*. 2018;319.  
14  
15 38. UK A. Maintenance and Reliever Therapy (MART)  
16  
17 [https://www.asthma.org.uk/advice/inhalers-medicines-treatments/inhalers-and-](https://www.asthma.org.uk/advice/inhalers-medicines-treatments/inhalers-and-spacers/mart/)  
18  
19 [spacers/mart/](https://www.asthma.org.uk/advice/inhalers-medicines-treatments/inhalers-and-spacers/mart/): Asthma UK; 2021 [  
20  
21  
22 39. Dixon EG, Rugg-Gunn CE, Sellick V, Sinha IP, Hawcutt DB. Adverse drug  
23 reactions of leukotriene receptor antagonists in children with asthma: a systematic  
24 review. *BMJ Paediatr Open*. 2021;5(1):e001206.  
25  
26 40. Boutopoulou B, Koumpagioti D, Matziou V, Priftis KN, Douros K. Interventions on  
27 Adherence to Treatment in Children With Severe Asthma: A Systematic Review. *Front*  
28 *Pediatr*. 2018;6:232.  
29  
30 41. Guevara JP, Wolf FM, Grum CM, Clark NM. Effects of educational interventions  
31 for self management of asthma in children and adolescents: systematic review and  
32 meta-analysis. *Bmj*. 2003;326(7402):1308-9.  
33  
34 42. Ducharme FM, Bhogal SK. The role of written action plans in childhood asthma.  
35 *Curr Opin Allergy Clin Immunol*. 2008;8(2):177-88.  
36  
37 43. Lakupoch K, Manuyakorn W, Preutthipan A, Kamalaporn H. The effectiveness of  
38 newly developed written asthma action plan in improvement of asthma outcome in  
39 children. *Asian Pac J Allergy Immunol*. 2018;36(2):88-92.  
40  
41 44. UK A. The reality of asthma care in the UK.  
42  
43 [https://www.asthma.org.uk/578f5bcf/globalassets/get-involved/external-affairs-](https://www.asthma.org.uk/578f5bcf/globalassets/get-involved/external-affairs-campaigns/publications/annual-asthma-care-survey/annual-asthma-survey-2018/asthmauk-annual-asthma-survey-2018-v7.pdf)  
44  
45 [campaigns/publications/annual-asthma-care-survey/annual-asthma-survey-](https://www.asthma.org.uk/578f5bcf/globalassets/get-involved/external-affairs-campaigns/publications/annual-asthma-care-survey/annual-asthma-survey-2018/asthmauk-annual-asthma-survey-2018-v7.pdf)  
46  
47 [2018/asthmauk-annual-asthma-survey-2018-v7.pdf](https://www.asthma.org.uk/578f5bcf/globalassets/get-involved/external-affairs-campaigns/publications/annual-asthma-care-survey/annual-asthma-survey-2018/asthmauk-annual-asthma-survey-2018-v7.pdf)2018.  
48  
49  
50  
51  
52  
53  
54  
55  
56  
57  
58  
59  
60

- 1  
2  
3 45. Society SAT. Guidelines for the management of chronic asthma in adolescents  
4 and adults. [https://pulmonology.co.za/wp-](https://pulmonology.co.za/wp-content/uploads/2016/11/Guideline_8.pdf)  
5 [content/uploads/2016/11/Guideline\\_8.pdf](https://pulmonology.co.za/wp-content/uploads/2016/11/Guideline_8.pdf); 2016.  
6  
7
- 8 46. Doroudchi A, Pathria M, Modena BD. Asthma biologics: Comparing trial designs,  
9 patient cohorts and study results. *Ann Allergy Asthma Immunol.* 2020;124(1):44-56.  
10
- 11 47. Galli SJ, Tsai M. IgE and mast cells in allergic disease. *Nat Med.* 2012;18(5):693-  
12 704.  
13
- 14 48. Busse WW, Morgan WJ, Gergen PJ, Mitchell HE, Gern JE, Liu AH, et al.  
15 Randomized trial of omalizumab (anti-IgE) for asthma in inner-city children. *N Engl J*  
16 *Med.* 2011;364(11):1005-15.  
17
- 18 49. Kulus M, Hébert J, Garcia E, Fowler Taylor A, Fernandez Vidaurre C, Blogg M.  
19 Omalizumab in children with inadequately controlled severe allergic (IgE-mediated)  
20 asthma. *Curr Med Res Opin.* 2010;26(6):1285-93.  
21
- 22 50. Corren J, Kavati A, Ortiz B, Colby JA, Ruiz K, Maiese BA, et al. Efficacy and  
23 safety of omalizumab in children and adolescents with moderate-to-severe asthma: A  
24 systematic literature review. *Allergy Asthma Proc.* 2017;38(4):250-63.  
25
- 26 51. Kau AL, Korenblat PE. Anti-interleukin 4 and 13 for asthma treatment in the era  
27 of endotypes. *Curr Opin Allergy Clin Immunol.* 2014;14(6):570-5.  
28
- 29 52. Corren J, Castro M, Chanez P, Fabbri L, Joish VN, Amin N, et al. Dupilumab  
30 improves symptoms, quality of life, and productivity in uncontrolled persistent asthma.  
31 *Ann Allergy Asthma Immunol.* 2019;122(1):41-9.e2.  
32
- 33 53. Castro M, Corren J, Pavord ID, Maspero J, Wenzel S, Rabe KF, et al. Dupilumab  
34 Efficacy and Safety in Moderate-to-Severe Uncontrolled Asthma. *New England Journal*  
35 *of Medicine.* 2018;378(26):2486-96.  
36
- 37 54. Tan LD, Bratt JM, Godor D, Louie S, Kenyon NJ. Benralizumab: a unique IL-5  
38 inhibitor for severe asthma. *J Asthma Allergy.* 2016;9:71-81.  
39
- 40 55. Ortega HG, Liu MC, Pavord ID, Brusselle GG, FitzGerald JM, Chetta A, et al.  
41 Mepolizumab Treatment in Patients with Severe Eosinophilic Asthma. *New England*  
42 *Journal of Medicine.* 2014;371(13):1198-207.  
43  
44  
45  
46  
47  
48  
49  
50  
51  
52  
53  
54  
55  
56  
57  
58  
59  
60

- 1  
2  
3 56. Pavord ID, Korn S, Howarth P, Bleecker ER, Buhl R, Keene ON, et al.  
4 Mepolizumab for severe eosinophilic asthma (DREAM): a multicentre, double-blind,  
5 placebo-controlled trial. *Lancet*. 2012;380(9842):651-9.  
6  
7  
8 57. Khatri S, Moore W, Gibson PG, Leigh R, Bourdin A, Maspero J, et al.  
9 Assessment of the long-term safety of mepolizumab and durability of clinical response  
10 in patients with severe eosinophilic asthma. *J Allergy Clin Immunol*. 2019;143(5):1742-  
11 51.e7.  
12  
13  
14 58. Gupta A, Ikeda M, Geng B, Azmi J, Price RG, Bradford ES, et al. Long-term  
15 safety and pharmacodynamics of mepolizumab in children with severe asthma with an  
16 eosinophilic phenotype. *J Allergy Clin Immunol*. 2019;144(5):1336-42.e7.  
17  
18  
19 59. Wechsler M, Hickey L, Garin M, Chauhan A. Efficacy of Reslizumab Treatment in  
20 Exacerbation-Prone Patients with Severe Eosinophilic Asthma. *The Journal of Allergy*  
21 *and Clinical Immunology: In Practice*. 2020;8.  
22  
23  
24 60. Virchow JC, Katial R, Brusselle GG, Shalit Y, Garin M, McDonald M, et al. Safety  
25 of Reslizumab in Uncontrolled Asthma with Eosinophilia: A Pooled Analysis from 6  
26 Trials. *The Journal of Allergy and Clinical Immunology: In Practice*. 2020;8(2):540-8.e1.  
27  
28  
29 61. Kolbeck R, Kozhich A, Koike M, Peng L, Andersson CK, Damschroder MM, et al.  
30 MEDI-563, a humanized anti-IL-5 receptor alpha mAb with enhanced antibody-  
31 dependent cell-mediated cytotoxicity function. *J Allergy Clin Immunol*.  
32 2010;125(6):1344-53.e2.  
33  
34  
35 62. Harrison TW, Chanez P, Menzella F, Canonica GW, Louis R, Cosio BG, et al.  
36 Onset of effect and impact on health-related quality of life, exacerbation rate, lung  
37 function, and nasal polyposis symptoms for patients with severe eosinophilic asthma  
38 treated with benralizumab (ANDHI): a randomised, controlled, phase 3b trial. *Lancet*  
39 *Respir Med*. 2021;9(3):260-74.  
40  
41  
42 63. Kallenbach JM, Frankel AH, Lapinsky SE, Thornton AS, Blott JA, Smith C, et al.  
43 Determinants of near fatality in acute severe asthma. *Am J Med*. 1993;95(3):265-72.  
44  
45  
46 64. Ardura-Garcia C, Stolbrink M, Zaidi S, Cooper PJ, Blakey JD. Predictors of  
47 repeated acute hospital attendance for asthma in children: A systematic review and  
48 meta-analysis. *Pediatr Pulmonol*. 2018;53(9):1179-92.  
49  
50  
51  
52  
53  
54  
55  
56  
57  
58  
59  
60

- 1  
2  
3 65. Nwaru BI, Ekström M, Hasvold P, Wiklund F, Telg G, Janson C. Overuse of  
4 short-acting  $\beta_2$ -agonists in asthma is associated with increased risk of  
5 exacerbation and mortality: a nationwide cohort study of the global SABINA programme.  
6 European Respiratory Journal. 2020;55(4):1901872.  
7  
8  
9  
10 66. Keeley D, Baxter N. Conflicting asthma guidelines cause confusion in primary  
11 care. BMJ. 2018;360:k29.  
12  
13 67. Mosnaim G, Li H, Martin M, Richardson D, Belice PJ, Avery E, et al. A tailored  
14 mobile health intervention to improve adherence and asthma control in minority  
15 adolescents. J Allergy Clin Immunol Pract. 2015;3(2):288-90.e1.  
16  
17 68. Katwa U, Rivera E. Asthma Management in the Era of Smart-Medicine: Devices,  
18 Gadgets, Apps and Telemedicine. Indian J Pediatr. 2018;85(9):757-62.  
19  
20 69. Burbank AJ, Lewis SD, Hewes M, Schellhase DE, Rettiganti M, Hall-Barrow J, et  
21 al. Mobile-based asthma action plans for adolescents. J Asthma. 2015;52(6):583-6.  
22  
23 70. Chan AH, Stewart AW, Harrison J, Camargo CA, Jr., Black PN, Mitchell EA. The  
24 effect of an electronic monitoring device with audiovisual reminder function on  
25 adherence to inhaled corticosteroids and school attendance in children with asthma: a  
26 randomised controlled trial. Lancet Respir Med. 2015;3(3):210-9.  
27  
28 71. UK A. Recovery and reset for respiratory: restoring and improving basic care for  
29 patients with lung disease.  
30  
31 [https://www.asthma.org.uk/283059c7/globalassets/campaigns/publications/restarting-](https://www.asthma.org.uk/283059c7/globalassets/campaigns/publications/restarting-basic-care-final.pdf)  
32 [basic-care-final.pdf](https://www.asthma.org.uk/283059c7/globalassets/campaigns/publications/restarting-basic-care-final.pdf)2020; 2020.  
33  
34  
35  
36  
37  
38  
39  
40  
41  
42  
43  
44  
45  
46  
47  
48  
49  
50  
51  
52  
53  
54  
55  
56  
57  
58  
59  
60

# BMJ Paediatrics Open

## Diagnosis and management of asthma in children

|                               |                                                                                                                                                                                                                                                                                                                                        |
|-------------------------------|----------------------------------------------------------------------------------------------------------------------------------------------------------------------------------------------------------------------------------------------------------------------------------------------------------------------------------------|
| Journal:                      | <i>BMJ Paediatrics Open</i>                                                                                                                                                                                                                                                                                                            |
| Manuscript ID                 | bmjpo-2021-001277.R1                                                                                                                                                                                                                                                                                                                   |
| Article Type:                 | Review                                                                                                                                                                                                                                                                                                                                 |
| Date Submitted by the Author: | 12-Apr-2022                                                                                                                                                                                                                                                                                                                            |
| Complete List of Authors:     | Martin, Joanne; Newcastle University, Translational and Clinical Research Institute<br>Townshend, Jennifer; Great North Children's Hospital, Paediatric Respiratory Medicine<br>Brodie, Malcolm; Newcastle University, Translational and Clinical Research Institute; Great North Children's Hospital, Paediatric Respiratory Medicine |
| Keywords:                     | Therapeutics                                                                                                                                                                                                                                                                                                                           |
|                               |                                                                                                                                                                                                                                                                                                                                        |

SCHOLARONE™  
Manuscripts

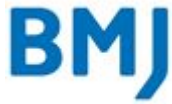

I, the Submitting Author has the right to grant and does grant on behalf of all authors of the Work (as defined in the below author licence), an exclusive licence and/or a non-exclusive licence for contributions from authors who are: i) UK Crown employees; ii) where BMJ has agreed a CC-BY licence shall apply, and/or iii) in accordance with the terms applicable for US Federal Government officers or employees acting as part of their official duties; on a worldwide, perpetual, irrevocable, royalty-free basis to BMJ Publishing Group Ltd ("BMJ") its licensees and where the relevant Journal is co-owned by BMJ to the co-owners of the Journal, to publish the Work in this journal and any other BMJ products and to exploit all rights, as set out in our [licence](#).

The Submitting Author accepts and understands that any supply made under these terms is made by BMJ to the Submitting Author unless you are acting as an employee on behalf of your employer or a postgraduate student of an affiliated institution which is paying any applicable article publishing charge ("APC") for Open Access articles. Where the Submitting Author wishes to make the Work available on an Open Access basis (and intends to pay the relevant APC), the terms of reuse of such Open Access shall be governed by a Creative Commons licence – details of these licences and which [Creative Commons](#) licence will apply to this Work are set out in our licence referred to above.

Other than as permitted in any relevant BMJ Author's Self Archiving Policies, I confirm this Work has not been accepted for publication elsewhere, is not being considered for publication elsewhere and does not duplicate material already published. I confirm all authors consent to publication of this Work and authorise the granting of this licence.

## Diagnosis and management of asthma in children

Joanne Martin<sup>1,2,3</sup>, Jennifer Townshend\*<sup>4</sup> and Malcolm Brodlie\*<sup>1,4</sup>

<sup>1</sup>Translational and Clinical Research Institute, Faculty of Medical Sciences, Newcastle University, Newcastle upon Tyne, United Kingdom

<sup>2</sup>Northern Foundation School, Health Education England North East, Newcastle upon Tyne, United Kingdom

<sup>3</sup>James Cook University Hospital, South Tees NHS Foundation Trust, Middlesbrough, United Kingdom

<sup>4</sup>Paediatric Respiratory Medicine, Great North Children's Hospital, Newcastle upon Tyne Hospitals NHS Foundation Trust, Newcastle upon Tyne, United Kingdom

\*Equal contribution

Corresponding author: Malcolm Brodlie, Paediatric Respiratory Medicine, Great North Children's Hospital, Level 3, Clinical Resource Building, Royal Victoria Infirmary, Newcastle upon Tyne, United Kingdom. NE1 4LP. E-mail [malcolm.brodlie@ncl.ac.uk](mailto:malcolm.brodlie@ncl.ac.uk)

Word count: 3160

Keywords: asthma; paediatrics; diagnosis; management; children

**ABSTRACT**

Asthma is the commonest chronic respiratory condition of childhood worldwide, with around 14% of children and young people affected. Despite the high prevalence, paediatric asthma outcomes are inadequate and there are several avoidable deaths each year. Characteristic asthma features include wheeze, shortness of breath and cough, which are typically triggered by a number of possible stimuli. There are several diagnostic challenges and as a result, both over and under diagnosis of paediatric asthma remain problematic.

Effective asthma management involves a holistic approach addressing both pharmacological and non-pharmacological management, as well as education and self-management aspects. Working in partnership with children and families is key in promoting good outcomes. Education on how to take treatment effectively, trigger avoidance, modifiable risk factors and actions to take during acute attacks via personalised asthma action plans is essential.

This review aims to provide an overview of good clinical practice in the diagnosis and management of paediatric asthma. We discuss the current diagnostic challenges and predictors of life-threatening attacks. Additionally, we outline the similarities and differences in global paediatric asthma guidelines and highlight potential future developments in care. It is hoped that this review will be useful for health care providers working in a range of child health settings.



## INTRODUCTION

Asthma is a chronic respiratory disease characterised by episodes of wheeze, cough, and shortness of breath. Around 14% of children worldwide have a diagnosis of asthma, making it the most common chronic respiratory disease of childhood[1].

Poor asthma control is associated with a number of negative effects on children and families. For example, they are more likely to be absent from school, have additional educational needs and have lower educational attainment[2]. Caregivers also experience missed work days and financial challenges as a result[3]. Some children will experience severe symptoms and life threatening attacks[4].

Taking the United Kingdom as an example, paediatric asthma outcomes are poor overall with considerable associated morbidity, high rates of emergency hospital admissions and most pertinently there are several preventable deaths each year[5]. Alarming, the National Review of Asthma Deaths (NRAD) found that in almost all paediatric cases, there were a number of significant avoidable contributing factors and that these deaths may have been preventable[6].

There are several factors that make the diagnosis and management of asthma in children challenging. The aim of this review is to explore these issues and highlight good clinical practice in the diagnosis and management of paediatric asthma.

## PRESENTATION OF ASTHMA

Children with asthma typically present with a symptom triad of wheeze, shortness of breath and cough. However, 'asthma' is an umbrella term used to describe this collection of symptoms and when present should prompt practitioners to ask, "what type of asthma is this?". There are a number of asthma subtypes that present and respond to treatment differently. Identification of the features of asthma and modifiable or treatable traits should

1  
2  
3 only be the start of the diagnostic journey[7]. Asthma symptoms are normally intermittent  
4 in nature and may not be present at the time of clinical review, making the diagnosis  
5 challenging in some cases[8]. Additionally, disease phenotypes are not fixed and may  
6 evolve over time necessitating ongoing review of symptoms and treatment[9].  
7  
8  
9

10  
11 Wheeze is a key feature of asthma and if not present, a diagnosis of asthma in a child is  
12 unlikely. Wheeze is an expiratory high-pitched whistle that occurs as a result of  
13 inflammation and narrowing of the small airways. Parental understanding of wheeze  
14 varies and clarifying what is meant when it is reported is key in making an accurate  
15 diagnosis[10].  
16  
17  
18  
19

20  
21  
22 The prevalence of 'preschool wheeze' is an additional challenge when diagnosing asthma  
23 in young children. In the first few years of life, many children will experience wheeze,  
24 however not all will go on to develop true asthma. The diagnosis of asthma should  
25 therefore be reviewed routinely, to identify true asthma and alter treatment where  
26 necessary[11]. Favourable response to an appropriate trial of asthma treatment is an  
27 important confirmatory piece of diagnostic evidence.  
28  
29  
30  
31

32  
33  
34 Clinical examination may be normal in children and adolescents with asthma if they  
35 present during asymptomatic periods. During acute attacks, use of accessory muscles of  
36 respiration and widespread wheeze may be present[12]. Chest hyperinflation may be  
37 identified in acute and chronic disease settings.  
38  
39  
40  
41

## 42 43 44 **ASTHMA TRIGGERS**

45  
46  
47  
48 Asthma attacks commonly occur following exposure to one or several triggers. Viral  
49 respiratory infections remain the leading cause[13], however there are a number of other  
50 known triggers (Table 1), including aeroallergens, second hand smoke exposure or  
51 changes in ambient air temperature or humidity. Identification and documentation of  
52  
53  
54  
55  
56  
57  
58  
59  
60

specific asthma triggers should be part of routine care. Education on trigger recognition and avoidance is essential.

**Table 1. Common asthma triggers**

|                                                                       |
|-----------------------------------------------------------------------|
| Viral respiratory tract infections[6]                                 |
| Exercise[6, 14]                                                       |
| Weather changes in temperature and humidity[6, 14]                    |
| Domestic pollutants - e.g. pests, mould, dust mites[6]                |
| Environmental pollutants - e.g. air pollution[6]                      |
| Secondhand smoke exposure[13, 14]                                     |
| Pets and animals[13]                                                  |
| Strong odours[13]                                                     |
| Anxiety or strong emotions[14]                                        |
| Drugs – e.g. non-steroidal anti-inflammatory drugs, beta-blockers[14] |
| Gastro-oesophageal reflux[14]                                         |

## RISK FACTORS FOR ASTHMA

There are a number of risk factors that should be explored in the history of children who present with features of asthma. In symptomatic children, a personal or family history of atopic features, including asthma, eczema or rhinitis, supports a diagnosis of asthma. Some additional risk factors are outlined in Table 2. Education on modifiable risk factors, for example, exposure to second hand smoke and obesity, should be delivered routinely during consultations and asthma reviews. A range of social determinants that are linked to poverty impact on outcomes and the health of children with asthma[15].

**Table 2. Asthma risk factors**

|                                                                                      |
|--------------------------------------------------------------------------------------|
| Personal or family history of atopy - eczema, allergic rhinitis, nasal polyposis[16] |
| Family history of asthma[16]                                                         |
| Exposure to second hand smoke[16]                                                    |
| Preterm birth[17]                                                                    |
| Low birth weight[18]                                                                 |
| Obesity[19]                                                                          |
| Poor housing quality/mould and dampness[6]                                           |
| Air pollution [20]                                                                   |

## PAEDIATRIC ASTHMA PHENOTYPES

Asthma is a heterogeneous disease in which there are several phenotypes and underlying endotypes. Phenotypes are subtypes of asthma that share clinical characteristics such as symptom triggers, atopic features, disease severity and response to treatment. Endotypes are subtypes of asthma that are characterised by similar underlying biological mechanisms[21].

Key endotypes include 'Type 2-high' and 'Type 2-low' asthma[22]. Identifying asthma phenotypes and endotypes can facilitate targeted treatment based on the pathophysiology occurring in a specific individual[23]. For example, allergic or eosinophilic asthma that frequently starts in childhood, is Type 2-high and characterised by eosinophilic airway inflammation, raised immunoglobulin (Ig) E and fractional exhaled nitric oxide (FeNO) levels[21]. Typically Type 2-high asthma responds well to inhaled corticosteroid (ICS) treatment[7]. A number of biologic agents can be used in the management of asthma, under specialist supervision, and their use varies on asthma endotypes (Table 8)[24].

## DIFFERENTIAL DIAGNOSES AND DIAGNOSTIC UNCERTAINTY

Misdiagnosis of asthma remains a major problem with rates of both under- and over-diagnosis being high[25]. Overdiagnosis is problematic as it exposes children to unnecessary side effects of medications and runs the risk of trivialising asthma[7].

There are several conditions that may be associated with chronic cough, wheeze and/or shortness of breath in children and therefore present similarly to asthma (Table 3). Due to the difficulties with diagnosis, especially in young children where objective testing is not possible, the diagnosis of 'asthma' should be reviewed at each clinical presentation and interaction.

**Table 3. Asthma differentials and clues in medical history**

| Differential diagnosis                                             | Possible features of history                                                                                                                                                                                                                                         |
|--------------------------------------------------------------------|----------------------------------------------------------------------------------------------------------------------------------------------------------------------------------------------------------------------------------------------------------------------|
| Cystic fibrosis[26, 27]                                            | <ul style="list-style-type: none"> <li>- Symptoms present from birth</li> <li>- Finger clubbing</li> <li>- Family History of cystic fibrosis or unexplained/atypical respiratory disease</li> <li>- Weight faltering</li> <li>- Gastrointestinal symptoms</li> </ul> |
| Primary ciliary dyskinesia[27]                                     | <ul style="list-style-type: none"> <li>- Symptoms present from birth</li> <li>- Family history of unexplained respiratory symptoms</li> <li>- Persistent cough</li> <li>- Nasal symptoms</li> </ul>                                                                  |
| Chronic lung disease of prematurity/bronchopulmonary dysplasia[27] | <ul style="list-style-type: none"> <li>- Premature</li> </ul>                                                                                                                                                                                                        |
| Bronchiectasis[26, 27]                                             | <ul style="list-style-type: none"> <li>- Persistent productive cough</li> <li>- Finger clubbing</li> </ul>                                                                                                                                                           |
| Laryngeal dysfunction[27]                                          | <ul style="list-style-type: none"> <li>- Stridor</li> </ul>                                                                                                                                                                                                          |

|                                                                     |                                                              |
|---------------------------------------------------------------------|--------------------------------------------------------------|
|                                                                     | - Abnormal cry                                               |
| Gastro-oesophageal reflux disease or aspiration[26]                 | - Vomiting<br>- Weight faltering<br>- Recurrent infections   |
| Structural abnormality - e.g. bronchomalacia, bronchogenic cyst[28] | - Present from birth<br>- No variation to wheeze             |
| Immunodeficiency[28]                                                | - Weight faltering<br>- Recurrent and/or atypical infections |
| Foreign body aspiration[28]                                         | - Sudden onset<br>- Unilateral chest features                |

## DIAGNOSING ASTHMA IN CHILDREN

There is no single 'gold-standard' test that can be used to accurately diagnose asthma. In practice, a diagnosis should be made based on characteristic symptom patterns, evidence of variability in airflow limitation in the presence of airway inflammation, likelihood of alternative diagnoses and response to treatment. Getting the diagnosis correct is key for optimal management of paediatric asthma.

Lung function tests can be used to aid the diagnosis of asthma in children over the age of 5 years. Peak expiratory flow (PEF) and spirometry are commonly used to assess airflow obstruction and reversibility. PEF can be used to detect diurnal variation, which is a typical feature of asthma. The Global Initiative for Asthma (GINA) specifically recommends the use of either PEF or spirometry in the diagnosis of asthma in children over 5 years[29]. Once a child is old enough to reliably perform lung function testing it is recommended that this is undertaken if the diagnosis of asthma has not been previously confirmed. In children under 5 lung function testing is rarely practical outside a research setting. This makes diagnosis in this age group additionally challenging[17]. Guidelines vary between countries and regions with regard to diagnostic criteria. An overview of the

1  
2  
3 similarities and differences between these guidelines is displayed in Table 4. Lung  
4 function testing is frequently used to monitor progress of children with asthma as part of  
5 their care. Objective testing should be repeated if there is poor response to treatment or  
6 diagnostic uncertainty.  
7  
8  
9

10  
11 FeNO is used to detect and quantify eosinophilic airway inflammation with levels elevated  
12 in those with eosinophilic asthma[30]. Once staff are trained, and provided equipment is  
13 available, FeNO is a practically useful test that is quick to perform in school-aged children.  
14 The exact positioning of FeNO testing varies between guidelines worldwide (Table 4).  
15 FeNO monitoring may also be useful in titrating dosage of ICS in those with an established  
16 diagnosis of asthma.[31]  
17  
18  
19  
20  
21  
22  
23

24 Allergy testing (skin prick testing or measurement of specific-IgE levels) is not routinely  
25 carried out in the diagnostic process; however, it is recommended in a number of clinical  
26 guidelines and may identify individual triggers[32-35].  
27  
28  
29  
30

31 There are several aspects that make paediatric asthma diagnosis challenging. Most  
32 diagnoses are made in primary care where there is often limited access to objective  
33 testing at present. Despite guideline recommendations objective testing is frequently only  
34 available in secondary or tertiary care settings where equipment and trained staff are  
35 available. The COVID-19 pandemic has served to exacerbate these issues and increase  
36 backlogs. Various solutions have been proposed, including community diagnostic hubs  
37 [36]. In some healthcare systems the cost of undergoing objective testing is a cause of  
38 health inequalities.  
39  
40  
41  
42  
43  
44  
45

46 Additionally, the symptom onset for most cases of paediatric asthma occurs before the  
47 age of 3 years[37] when lung function testing cannot be used to aid diagnosis. In this age  
48 group, response to an asthma treatment trial is useful to aid diagnostic decision making  
49 and is recommended in a number of national guidelines[35, 38-40].  
50  
51  
52  
53  
54  
55  
56  
57  
58  
59  
60

**Table 4. Summary of paediatric asthma national guidelines – focusing on diagnosis.**

| Guideline                                         | Year | Diagnostic criteria                                                                                                                                                                                                                                                                                                                                                     | Recommended objective testing                                                                                                                                                                                                             | When to refer to a specialist                                                                                                                                                            | When to consider alternative diagnoses                                                                            |
|---------------------------------------------------|------|-------------------------------------------------------------------------------------------------------------------------------------------------------------------------------------------------------------------------------------------------------------------------------------------------------------------------------------------------------------------------|-------------------------------------------------------------------------------------------------------------------------------------------------------------------------------------------------------------------------------------------|------------------------------------------------------------------------------------------------------------------------------------------------------------------------------------------|-------------------------------------------------------------------------------------------------------------------|
| NICE Guidelines (United Kingdom)[26]              | 2017 | <u>Under 5 years:</u> Findings in clinical history and examination that are suggestive of asthma<br><u>Over 5 years:</u> Findings in clinical history and examination that are suggestive of asthma <i>and</i> either spirometry demonstrating obstructive airflow and bronchodilator reversibility <i>or</i> a FeNO level of 35 ppb or more                            | <u>Over 5 years:</u> Spirometry and bronchodilator reversibility <i>or</i> FeNO 1st line.<br>Additional tests PEF, bronchial challenge test with histamine or methacholine                                                                | Children who are not responding to treatment and cannot complete objective testing<br><br>If there is obstructive spirometry but negative bronchodilator reversibility and negative FeNO | When children have symptoms of asthma but normal objective testing results                                        |
| Global Initiative for Asthma (Global)[29]         | 2021 | <u>6 years and over:</u> Findings in clinical history that are suggestive of asthma <i>plus</i> evidence of variability in expiratory airflow limitation with either spirometry and bronchodilator reversibility, repeated PEF measurements, positive exercise challenge or positive bronchial challenge                                                                | <u>6 years and over:</u> Either spirometry, PEF, exercise challenge <i>or</i> bronchial challenge to detect variability in lung function                                                                                                  | Diagnostic uncertainty, previous life threatening attack, no/poor response to asthma treatment                                                                                           | Atypical asthma features, atypical clinical examination findings - e.g. cardiac murmurs                           |
| Canadian Thoracic Society (Canada)[40]            | 2021 | <u>Aged 1-5 years:</u> More than one presentation of asthma like symptoms <i>plus</i> a response to asthma treatment trial<br><u>Over 6 years:</u> Findings in clinical history that are suggestive of asthma <i>plus</i> spirometry showing obstructive expiration and demonstration of reversibility of airflow limitation of at least 12%                            | <u>Over 6 years</u><br>Spirometry and bronchodilator reversibility (1st line). Additional tests that may be useful - peak flow variability, bronchial challenge and exercise challenge                                                    | Diagnostic uncertainty, severe asthma, previous life threatening attack, need for allergy testing, any hospitalisation as a result of asthma                                             |                                                                                                                   |
| National Asthma Council Australia (Australia)[38] | 2021 | <u>Aged 1-5 years</u><br>Findings in clinical history and examination that are suggestive of asthma <i>plus</i> a response to treatment trial with SABA and/or ICS<br><u>6 years and over</u><br>Findings in clinical history and examination that are suggestive of asthma <i>plus</i> spirometry demonstration of reversibility of airflow limitation of at least 12% | <u>Aged 1-5 years:</u> None<br><br><u>6 years and over:</u> Spirometry 1st line. Bronchial challenge test and exercise testing to be considered if spirometry results does not show a reversibility of airflow limitation of at least 12% | When child has characteristic asthma symptoms and diagnosis is not clear from objective testing results                                                                                  | Atypical asthma features<br>No response to treatment trials<br>Results of objective testing do not suggest asthma |
| ARF NZ (New)                                      | 2020 | <u>Aged 1-11:</u> Findings in clinical history that are suggestive of asthma <i>plus</i> a response to asthma treatment trial                                                                                                                                                                                                                                           | <u>Aged 5-11 years:</u> Spirometry should be considered if asthma symptoms are atypical or in those with typical                                                                                                                          | When there is no response to asthma treatment trials                                                                                                                                     | Atypical asthma features                                                                                          |



|                                                 |      |                                                                                                                                                                                                                                                                                                   |                                                                                                                                                                                                                                                                                                                                                   |                                                                                                                                                 |                                                                                                   |
|-------------------------------------------------|------|---------------------------------------------------------------------------------------------------------------------------------------------------------------------------------------------------------------------------------------------------------------------------------------------------|---------------------------------------------------------------------------------------------------------------------------------------------------------------------------------------------------------------------------------------------------------------------------------------------------------------------------------------------------|-------------------------------------------------------------------------------------------------------------------------------------------------|---------------------------------------------------------------------------------------------------|
| Zealand)[39]                                    |      |                                                                                                                                                                                                                                                                                                   | asthma symptoms that do not respond to a treatment trial                                                                                                                                                                                                                                                                                          | and/or there is diagnostic uncertainty                                                                                                          |                                                                                                   |
| Irish College of GPs (Ireland)[41]              | 2020 | <u>Under 6 years:</u> Findings in clinical history that are suggestive of asthma<br><u>Over 6 years:</u> Findings in clinical history that are suggestive of asthma <i>plus</i> evidence of obstructive airflow limitation and reversibility with bronchodilators                                 | <u>Under 6 years:</u> Treatment trial<br><u>Over 6 years:</u> PEF <i>or</i> spirometry.                                                                                                                                                                                                                                                           | Parental concern or request, failure to respond to treatment trial, failure to thrive, diagnostic uncertainty                                   |                                                                                                   |
| The Japanese Society of Allergology (Japan)[35] | 2020 | <u>All ages:</u> Findings in clinical history that are suggestive of asthma <i>plus</i> a response to asthma treatment trial                                                                                                                                                                      | Lung function testing (non-specified), skin prick testing, bronchodilator reversibility testing, bronchial challenge                                                                                                                                                                                                                              | Poor response to multiple agent therapy or multiple courses of oral steroids                                                                    | Atypical asthma features, no response to treatment trial or atypical results on objective testing |
| Int. Consensus on Ped. Asthma (Global)[33]      | 2015 | <u>Under 5 years:</u> Findings in clinical history that are suggestive of asthma<br><u>Over 5 years:</u> Findings in clinical history that are suggestive of asthma <i>plus</i> spirometry with bronchodilator reversibility demonstration of reversibility of airflow limitation of at least 12% | <u>Over 5 years:</u> Spirometry 1 <sup>st</sup> line. PEF is useful for aiding. FeNO and skin prick testing for detecting allergic asthma can be useful.                                                                                                                                                                                          |                                                                                                                                                 |                                                                                                   |
| GEMA (Spain)[32]                                | 2009 | <u>Under 6 years:</u> Findings in clinical history that are suggestive of asthma<br><u>Over 6 years:</u> Findings in clinical history that are suggestive of asthma <i>plus</i> spirometry with bronchodilator reversibility demonstration of reversibility of airflow limitation of at least 12% | <u>6 years and over</u><br>Spirometry with combined bronchodilator reversibility. FeNO and allergy testing may be useful if diagnosis is unclear                                                                                                                                                                                                  |                                                                                                                                                 |                                                                                                   |
| Ministry of Health (Singapore)[34]              | 2008 | <u>All ages:</u> Findings in clinical history and examination that are suggestive of asthma                                                                                                                                                                                                       | No objective testing normally required for diagnosis. PEF at every consultation and spirometry at least annually in children over 6 years to assess asthma severity.<br>Tests that may be considered - CXR to exclude foreign bodies and chronic LRTIs, skin prick testing to detect atopy and exercise testing to assess exercise induced asthma | High risk patients with poor control, young age and poor response to treatment trial, when requiring high doses of steroids to control symptoms | -                                                                                                 |

Resources, in terms of equipment and appropriately trained staff to perform testing in children are substantial limitations in primary care at present. Ideally PEF, spirometry and FeNO could be performed in primary care. With the addition of skin prick testing and blood work in secondary care and bronchial challenge and exercise testing reserved for tertiary care. Abbreviations: NICE: National Institute for Health and Care Excellence; FeNO: Fractional exhaled Nitric Oxide; ppb:

1  
2  
3  
4  
5  
6  
7  
8  
9  
10  
11  
12  
13  
14  
15  
16  
17  
18  
19  
20  
21  
22  
23  
24  
25  
26  
27  
28  
29  
30  
31  
32  
33  
34  
35  
36  
37  
38  
39  
40  
41  
42  
43  
44  
45  
46  
47

parts per billion; PEF: Peak Expiratory Flow; SABA: Short-Acting Beta Agonist; ICS: Inhaled CorticoSteroid; ICU: Intensive Care Unit; CXR: Chest X-Ray; LRTI: Lower Respiratory Tract Infection.

Confidential: For Review Only

## MANAGEMENT OF ASTHMA IN CHILDREN

The management of asthma is multifactorial and to optimise disease control a number of pharmacological, non-pharmacological and self-management aspects need to be considered.

### 1. Pharmacological management

The pharmacological management of asthma involves two key components; maintenance and reliever therapies. Maintenance therapies are the mainstay of asthma management and the treatment aim is that no reliever therapies are required. Use of reliever therapy suggests asthma control is poor.

An overview of maintenance and reliever therapies is outlined in Tables 5 and 6 respectively. A stepwise approach to asthma management is encouraged and pharmacological management varies on age, symptom control and the national guideline used. An overview of management approach in a number of national guidelines is summarised in Table 7.

GINA guidelines recommend dual ICS and short-acting beta-2 agonist (SABA) therapy to children over the age of 5[29]. SABA monotherapy was previously the main management starting point, however compared with combined treatment, SABA monotherapy has been shown to be associated with asthma mortality[42]. SABA monotherapy is now only recommended by GINA for use in children aged 5 or less[29]. As seen in Table 7, GINA recommends symptom-driven ICS use, compared to daily ICS use, as initial therapy in children over 6 years of age. In comparison to daily ICS use, symptom-driven use has demonstrated a similar exacerbation risk and reduces the risk of ICS adverse effects[43].

Single Maintenance and Reliever Therapy (SMART) inhalers are combined inhalers offering both maintenance and reliever therapy in those with asthma. These inhalers contain a number of maintenance and reliever therapies in different combinations. The

use of these inhalers have been shown to reduce the risk of asthma attacks and ED admissions[44], improve lung function and decrease the need for reliever therapy[45]. There is limited evidence in the effectiveness of SMART inhalers in children, however children over 12 years may be prescribed a SMART inhaler, which acts as both a maintenance and reliever therapy, if symptoms are not well controlled[46].

There are a number of biologic agents (Table 8) that may be used in the management of paediatric asthma. These are endotype-specific, targeted therapies that should be used only under the supervision of specialists. Their availability and cost varies between countries and different healthcare systems. Detailed appraisal of the evidence base for their use is provided in the individual management guidelines and has been recently reviewed[23].

**Table 5. Maintenance therapies**

| Maintenance therapies                                      | Comments                                                                                                                                                                                                                                                                            |
|------------------------------------------------------------|-------------------------------------------------------------------------------------------------------------------------------------------------------------------------------------------------------------------------------------------------------------------------------------|
| Inhaled corticosteroids (ICS)                              | Currently used as a first line maintenance agent in a number of national guidelines[26, 29, 39, 41]. When using ICS, the lowest possible dose to effectively control symptoms should be used to prevent possible adverse effects of reduced growth and risk of adrenal suppression. |
| Long-acting beta-2 agonists (LABA)                         | Used as an add on therapy when dual ICS and SABA (short-acting beta-2 agonists) therapy is ineffective. In comparison to SABA, bronchodilation duration is prolonged to 12 hours.                                                                                                   |
| Leukotriene receptor antagonists (LTRA) (e.g. montelukast) | Used as an add on therapy in those who have poor symptom control despite ICS and LABA treatments[26, 29, 32, 35, 38, 40].<br><br>There have been a number of concerns raised regarding possible adverse                                                                             |

|                                                             |                                                                                                                                                                                                                                                                                                                                               |
|-------------------------------------------------------------|-----------------------------------------------------------------------------------------------------------------------------------------------------------------------------------------------------------------------------------------------------------------------------------------------------------------------------------------------|
|                                                             | reactions to montelukast. These include neuropsychiatric features ranging from poor sleep to suicidal ideation[47].                                                                                                                                                                                                                           |
| Long-acting muscarinic antagonists (LAMA) (e.g. tiotropium) | Used as an add on therapy in those who have poor symptoms control despite ICS and LABA therapies.                                                                                                                                                                                                                                             |
| Oral theophylline                                           | Used as an add on therapy, usually in those with uncontrolled symptoms despite several maintenance and reliever therapies.<br><br>Monitoring of plasma level required on initiation of treatment and dose changes.                                                                                                                            |
| Biologics                                                   | Use as an add on therapy, under specialist care, in those who have poorly controlled symptoms despite being on several maintenance and reliever therapies. A number of biologic agents are available (Table 8). Various individual biologics have been shown to reduce attacks, improve lung function and reduce oral corticosteroid use[24]. |

**Table 6. Reliever therapies**

| Reliever therapies                  | Comments                                                                                                                                                                                                                                                                                                                                                                                                            |
|-------------------------------------|---------------------------------------------------------------------------------------------------------------------------------------------------------------------------------------------------------------------------------------------------------------------------------------------------------------------------------------------------------------------------------------------------------------------|
| Short-acting beta-2 agonists (SABA) | Currently used as a first line reliever agent in a number of national guidelines. Effects of bronchodilation last for up to 4 hours.<br><br>SABAs work by rapidly relaxing the smooth muscle of small airways, providing quick relief from asthma symptoms.<br><br>Should be delivered via an age-appropriate spacer device or only if requiring supplemental oxygen via a nebuliser. Older children may be able to |

|                      |                                                                                                                                                                                                                                           |
|----------------------|-------------------------------------------------------------------------------------------------------------------------------------------------------------------------------------------------------------------------------------------|
|                      | use a handheld device without a spacer if trained and deemed competent in using it effectively.                                                                                                                                           |
| Oral corticosteroids | Used as a short-term therapy during asthma attacks to reduce airway inflammation and ease symptoms. Repeated short-term courses of oral steroids suggest poor chronic symptom control and should trigger a review of maintenance therapy. |

## 2. Non-pharmacological management

Non-pharmacological aspects of asthma management include providing education on modifiable risk factors and comorbidities to caregivers and conducting annual asthma reviews to assess control and future risk.

Education is key to improving caregiver and child understanding of asthma and its management. Clear information regarding modifiable risk factors, such as smoke exposure, domestic pollutants and obesity, should be given. Short term educational interventions aimed to improve self-management have been shown to increase medication adherence[48], improve symptom control and reduce mortality[49].

All young people with asthma should have asthma reviews at least annually. These reviews should focus on current symptom control and management, previous attacks, triggers, modifiable risk factors and personal asthma action plans (PAAPs). Asthma reviews are opportunities to assess child and caregiver understanding of asthma and provide education if necessary. Annual asthma reviews are also opportunities to assess inhaler technique (including spacer use) and provide education on this if necessary. Poor inhaler technique is common in young people with asthma[50] and associated with poor disease control[51].

1  
2  
3 Taking time to understand the perceptions of young people and their caregivers in relation  
4 to their asthma diagnosis and management is important and exploring such perceptions  
5 may enhance engagement during consultations, subsequently improving outcomes for  
6 young people[52].  
7  
8  
9

### 10 11 12 13 14 15 16 17 **3. Self-management** 18

19  
20 Self-management aspects of paediatric asthma management include asthma education  
21 and PAAPs. PAAPs are written documents that are given to young people and/or  
22 caregivers that advise them on day to day asthma management and what to do in the  
23 event of an attack[53]. Action plans should be created with patient/caregiver input, shared  
24 with relevant individuals (e.g. school teachers) and should be reviewed and updated  
25 regularly. PAAPs have been shown to reduce ED attendance, missed school days and  
26 increase caregiver confidence when managing attacks[54]. The 2018 Annual Asthma  
27 Survey found that over 50% of children with asthma in the United Kingdom had no PAAP  
28 and around 20% of caregivers did not seek medical advice during acute asthma attacks,  
29 highlighting large gaps in education[55].  
30  
31  
32  
33  
34  
35  
36  
37  
38

39 Diet and exercise are additional important self-management aspects within paediatric  
40 asthma care. A number of short term exercise interventions have demonstrated  
41 improvements in lung function and symptom control[56]. Healthy eating interventions can  
42 help reduce BMI and improve the quality of life of both young people and their  
43 caregivers[57].  
44  
45  
46  
47  
48  
49  
50  
51  
52  
53  
54  
55  
56  
57  
58  
59  
60

**Table 7. Summary of paediatric asthma national guidelines – focusing on management**

| Guideline                                              | Year | 1st line management                                                                                                                                             | Add on therapies*                                                                                                                                                                                                                                                                                                                                                                                                                                                                                      | Treatment withdrawal                                                                                                                       |
|--------------------------------------------------------|------|-----------------------------------------------------------------------------------------------------------------------------------------------------------------|--------------------------------------------------------------------------------------------------------------------------------------------------------------------------------------------------------------------------------------------------------------------------------------------------------------------------------------------------------------------------------------------------------------------------------------------------------------------------------------------------------|--------------------------------------------------------------------------------------------------------------------------------------------|
| NICE Guidelines (United Kingdom)[26]                   | 2017 | <u>Aged 1-4 years</u><br>SABA monotherapy<br><u>Aged 5-16 years</u><br>SABA monotherapy                                                                         | <u>Aged 1-4 years</u> : 2nd line: low dose ICS; 3rd line: low dose ICS and LTRA; 4th line: referral for specialist management<br><u>Aged 5-16 years</u> : 2nd line: low dose ICS; 3rd line: low dose ICS and LTRA; 4th line: low dose ICS and LABA; 5th line: high dose ICS and LABA; 6th line - referral for specialist management                                                                                                                                                                    | Consider withdrawing maintenance treatment after 3 months of stable asthma. Only consider stopping ICS on those who are on ICS monotherapy |
| Global Initiative for Asthma (Global)[29]              | 2021 | <u>5 years and under</u><br>SABA monotherapy<br><u>6-11 years</u><br>Combined low dose ICS+SABA (as needed)<br><u>Adolescents</u><br>Combined low dose ICS+SABA | <u>5 years and under</u> : 2nd line: low dose ICS; 3rd line: medium dose ICS or low dose ICE and LTRA; 4th line: refer for expert advice<br><u>Aged 6-11 years</u> : 2nd line: low dose ICS; 3rd line: low dose ICS and LABA or medium dose ICS or daily SMART combined ICS/LABA. Refer for expert advice; 4th line: refer for phenotype assessment<br><u>Adolescents</u> : 2nd line: low dose ICS; 3rd line: medium dose ICS; 4th line: medium/high dose ICS +/- LAMA. Refer for phenotype assessment | Stepping down treatment should be considered when both asthma symptoms and lung function have been stable for a period of 3 months or more |
| Canadian Thoracic Society (Canada)[40]                 | 2021 | <u>Aged 1-5 years</u><br>SABA monotherapy<br><u>Aged 6 -11</u><br>SABA monotherapy<br><u>Age 12+</u><br>SABA monotherapy                                        | <u>Aged 1-5 years</u> : 2nd line – ICS and LTRA; 3rd line - high dose ICS and LTRA; 4 <sup>th</sup> line - referral for specialist management<br><u>Aged 6 -11</u> : 2nd line - ICS and LTRA; 3rd line: high dose ICS and LTRA; 4th line: high dose ICS, LTRA and LABA; 5th line: high dose ICS, LTRA, LABA and oral steroids<br><u>Age 12+</u> : 2nd line: ICS and LTRA; 3rd line: ICS, LTRA and LABA; 4th line: high dose ICS, LTRA, LABA and tiotropium                                             | After asthma has been well controlled for a period of 3-6 months                                                                           |
| National Asthma Council Australia [38]                 | 2021 | <u>Aged 1-5 years</u><br>SABA monotherapy<br><u>Aged 6 and over</u><br>SABA monotherapy                                                                         | <u>Age 1-5 years</u> : 2nd line: low dose ICS or LTRA; 3rd line: low dose ICS and LTRA; 4th line: referral for specialist management<br><u>Age 6 and over</u> : 2nd line: low dose ICS or LTRA; 3rd line: low dose ICS and LTRA or high dose ICS or ICS/LABA combination; 4th line: referral for specialist management                                                                                                                                                                                 | Step down of treatment should be considered when symptoms have been well controlled for a period of at least 6 months                      |
| Asthma and Respiratory Foundation NZ (New Zealand)[39] | 2020 | <u>Aged 1-4 years</u><br>SABA and low dose ICS<br><u>Aged 5-11 years</u><br>SABA monotherapy                                                                    | <u>Age 1-4 years</u> : 2nd line: low dose ICS and LTRA; 3rd line: referral for specialist management<br><u>Age 5-11 years</u> : 2nd line: SABA and low dose ICS; 3rd line: LABA and low dose ICS; 4th line: LABA, high dose ICS, LTRA and referral for specialist management                                                                                                                                                                                                                           | If child has been stable for 3 months or more on treatment, step down with an incremental approach                                         |
| Irish College of General Practitioners (Ireland)[41]   | 2020 | <u>Aged 6-11</u><br>ICS and SABA (ICS only to be taken when SABA is used as a reliever)                                                                         | <u>Aged 6-11</u> : 2nd line: low dose ICS or LTRA (if ICS is not appropriate); 3rd line: low dose ICS and LABA or high dose ICS; 4th line: medium dose ICS, LABA and referral to paediatrics for management advice; 5th line: refer to paediatrics for phenotype assessment                                                                                                                                                                                                                            |                                                                                                                                            |



|                                                          |      |                                                                                           |                                                                                                                                                                                                                                                                                                                                                                                                                                                                                                                                                                                |                                                                                                                                            |
|----------------------------------------------------------|------|-------------------------------------------------------------------------------------------|--------------------------------------------------------------------------------------------------------------------------------------------------------------------------------------------------------------------------------------------------------------------------------------------------------------------------------------------------------------------------------------------------------------------------------------------------------------------------------------------------------------------------------------------------------------------------------|--------------------------------------------------------------------------------------------------------------------------------------------|
|                                                          |      | <u>Adolescents</u><br>ICS and SABA (ICS only to be taken when SABA is used as a reliever) | <u>Adolescents</u> : 2nd line: low dose ICS; 3rd line: low dose ICS and LABA; 4th line: medium dose ICS and LABA or low dose ICS, LABA and LAMA; 5th line: refer to paediatrics for phenotype assessment                                                                                                                                                                                                                                                                                                                                                                       |                                                                                                                                            |
| The Japanese Society of Allergology (Japan)[35]          | 2020 | <u>Aged 1-5 years</u><br>SABA monotherapy<br><u>Aged 6-15 years</u><br>SABA monotherapy   | <u>Age 1-5 years</u> : 2nd line: low dose ICS or LTRA or Disodium cromoglycate (DSCG); 3rd line: medium dose ICS; 4th line: high dose ICS and LTRA<br><u>Age 6-15 years</u> : 2nd line: low dose ICS or LTRA; 3rd line: medium dose ICS or combined low dose ICS/LABA; 4th line: high dose ICS or combined medium dose ICS/LABA                                                                                                                                                                                                                                                | -                                                                                                                                          |
| International Consensus on Pediatric Asthma (Global)[33] | 2015 | Quotes GINA and NICE guidelines                                                           | Quotes GINA and NICE guidelines                                                                                                                                                                                                                                                                                                                                                                                                                                                                                                                                                |                                                                                                                                            |
| GEMA (Spain)[32]                                         | 2009 | <u>Aged 3 and under</u><br>SABA monotherapy<br><u>Aged 3 and over</u><br>SABA monotherapy | <u>Aged 3 and under</u> : 2nd line: low dose ICS or LTRA; 3rd line: moderate dose ICS or low dose ICS and LTRA; 4th line: moderate dose ICS and LTRA; 5th line: high dose ICS and LTRA. Consider adding LABA; 6th line: oral steroids<br><u>Aged 3 and over</u> : 2nd line: low dose ICS or LTRA; 3rd line: moderate dose ICS or low dose ICS and LTRA or low dose ICS and LABA; 4th line: moderate dose ICS and LTRA or moderate dose ICS and LABA; 5th line: high dose ICS and LABA. Consider adding LTRA and theophyllines; 6th line: consider oral steroids and omalizumab |                                                                                                                                            |
| Ministry of Health (Singapore)[34]                       | 2008 | No stepwise approach outlined                                                             | No stepwise approach outlined                                                                                                                                                                                                                                                                                                                                                                                                                                                                                                                                                  | Consider stepping down treatment when symptoms are stable for 3 to 6 months considering the child's risk of poor outcomes. Do not stop ICS |
| South African Thoracic Society (South Africa)[58]        | 2007 | <u>Adolescents</u><br>SABA + low dose ICS                                                 | <u>Adolescents</u> : 2nd line: LABA and ICS; 3rd line: LABA, low dose ICS and LTRA/LABA or high dose ICS or LABA, low dose ICS and theophyllines. Consider oral corticosteroids; 4th line: referral to specialist                                                                                                                                                                                                                                                                                                                                                              | -                                                                                                                                          |

\*SABA reliever therapy as required at any stage

Abbreviations: SABA: Short-Acting Beta Agonist; ICS: Inhaled CorticoSteroid; LTRA: LeukoTriene Receptor Antagonist; LABA: Long-Acting Beta Agonist; LAMA: Long-Acting Muscarinic Antagonists

**Table 8. Biologic agents used in the management of asthma**

| Biologic     | Route and frequency                                                      | Mechanism of action                                                                                                                                                                                                                                  | Effect on asthma symptoms*                       | Effect on attacks and mortality* | Safety concerns/Common adverse reactions*                                                                 |
|--------------|--------------------------------------------------------------------------|------------------------------------------------------------------------------------------------------------------------------------------------------------------------------------------------------------------------------------------------------|--------------------------------------------------|----------------------------------|-----------------------------------------------------------------------------------------------------------|
| Omalizumab   | S/C injection every 4 weeks                                              | IgG1 <sub>K</sub> antibody that binds to the Fc portion of IgE, resulting in the inability of IgE to bind to the IgE receptor on mast cells[59]. This reduces the concentration of free circulating IgE and consequently mast cell degranulation[60] | Improved asthma symptoms[61]                     | Reduce asthma attacks[61, 62]    | Mild injection site reactions, headache, pyrexia, abdominal pain, gastroenteritis and nasopharyngitis[63] |
| Dupilumab    | S/C injection every 2 weeks                                              | Binds to alpha component of IL-4 receptor blocking IL-4 and IL-13 stimulation of B-cells[64]                                                                                                                                                         | Improved asthma symptoms and quality of life[65] | Reduced asthma attacks[66]       | Mild injection site reactions and eosinophilia[66]                                                        |
| Mepolizumab  | S/C injection every 4 weeks                                              | Binds to IL-5 cytokines resulting in reduced peripheral eosinophilia and reduced airway inflammation[67]                                                                                                                                             | Improved asthma symptoms and quality of life[68] | Reduced asthma attacks[68, 69]   | Headache, attack of asthma symptoms and bronchitis[70, 71]                                                |
| Reslizumab   | IV infusion every 4 weeks                                                | Binds to IL-5 cytokines resulting in reduced peripheral eosinophilia and reduced airway inflammation[67]                                                                                                                                             | Improved asthma symptoms and quality of life[72] | Reduced asthma attacks[72]       | Attack of asthma symptoms, nasopharyngitis and upper respiratory tract infections[73]                     |
| Benralizumab | S/C injection every 4 weeks for the first 3 doses and then every 8 weeks | Binds to alpha component of IL-5 receptor resulting in reduced eosinophil activation from IL-5[74]                                                                                                                                                   | Improved asthma symptoms and quality of life[75] | Reduced asthma attacks[75]       | Headache, sinusitis, nasopharyngitis and pyrexia[75]                                                      |

\*Detailed appraisal of the evidence base for their use is provided in the individual management guidelines and has been recently reviewed[23].

## Withdrawing management/stepping down

Asthma control should be reviewed at every medical contact. When asthma symptoms are well controlled on pharmacological therapy, stopping or stepping down medication should be considered to protect young people from unnecessary adverse effects.

The GINA 2021 guidelines advise that clinicians should consider stepping down asthma management to the lowest effective treatment regimen when good symptom control has been achieved for at least 3 months[29]. When stepping down treatment an individualised risk-benefit approach should be taken with focus on the child's medical history including frequency of oral corticosteroid use, frequency of asthma attacks and previous intensive or high dependency care admissions[76].

## WHEN TO REFER TO A SPECIALIST

Most paediatric asthma cases are diagnosed in primary care without the input of general paediatricians or paediatric respiratory physicians[6]. However, a number of children with asthma may need to be referred to specialists for diagnostic or management input. Common indications for specialist referral include no or poor response to asthma treatments, inconclusive objective testing, poor symptom control with appropriate treatment, frequent oral corticosteroid use or the occurrence of a severe asthma attack[26, 29, 35, 38, 39, 41]. A key element of specialist care is a multidisciplinary team consisting of a number of professionals, including specialist nurses, psychologists, physiologists and pharmacists.

Health care professionals must consider any safeguarding implications at all paediatric asthma reviews as part of delivering holistic care. Unexplained or frequent 'do not attend' appointments or suspicion of poor medical management at home should be flagged and acted upon locally.

## PREDICTORS OF LIFE-THREATENING ATTACKS

The following features have been shown to increase the likelihood of future severe attacks and particular attention should be given to these factors during asthma reviews.

1. Previous attack: The strongest risk factor for a future asthma attack is a personal history of a previous attack. One large systematic review and meta-analysis found that children with a recent history of ED attendance with an asthma attack were up to 5.8 times more likely to have another ED attendance and up to 3 times more likely to be admitted to hospital with a future asthma attack[77].
2. Frequent SABA use and prescription requests: Frequent use of SABA reliever therapy suggests poor control of asthma symptoms. If asthma symptoms are well controlled, no more than two SABA inhalers should be required annually[78]. The UK NRAD found that excess SABA prescription and use was prominent in individuals who died of asthma attacks. For those with data available, around 40% had been prescribed 12 or more SABA inhalers in the 12 months before death[6].

## POST-ATTACK REVIEW

Asthma attacks should be viewed as never events. It is essential that a post-attack review is conducted to review asthma maintenance treatment, as this is likely to be suboptimal. Failure to review patients post-attack, and alter treatment where appropriate, is likely to predispose to future attacks, which could be life-threatening. Management of the current attack should be reviewed to ensure treatment is appropriate and symptoms are resolving. Some individuals may require additional courses of oral corticosteroids to settle symptoms[7].

Current NICE quality standards (UK) state that all individuals hospitalised with an asthma attack should receive a follow up review in primary care within 2 working days of

1  
2  
3 discharge[26], to review maintenance management and ensure resolution of symptoms.  
4  
5 However, the 2018 National Asthma Survey completed in the UK found that 64% of  
6  
7 respondents had no primary care follow up post-attack and most patients were not aware  
8  
9 that this was required[55].  
10

### 11 12 13 **Salbutamol weaning**

14  
15  
16  
17 Salbutamol weaning plans are commonly used by a number of healthcare organisations  
18 following discharge after an asthma attack. These plans direct caregivers to provide  
19 regular SABA therapy, often in a reducing regime, in the days following discharge. There  
20 have been a number of concerns raised with regards to these plans with some believing  
21 that providing regular SABA therapy may potentially mask deterioration and could delay  
22 care givers seeking medical advice[79]. Healthcare professionals should enquire about  
23 salbutamol weaning plans during post-attack reviews and urge caregivers to seek medical  
24 advice if they have concerns or the effects of SABA are not lasting the 4 hours of duration.  
25  
26  
27  
28  
29  
30  
31  
32  
33

### 34 **FUTURE DEVELOPMENTS IN CARE**

35  
36  
37 The management of paediatric asthma is changing over time with, just as two examples,  
38 developments in technology and service structure.  
39  
40  
41

- 42  
43 1. Technology. The growing use of technology in asthma care has huge potential to  
44 improve clinical outcomes. Smartphone applications can be used to provide  
45 medication reminders to users and this has been shown to increase ICS  
46 adherence[80]. Applications can also be used to provide educational content to young  
47 people and care givers[81], as well as store personal asthma action plans[82]. 'Smart'  
48 inhalers, not to be confused with SMART inhalers, are devices that can provide audio  
49 reminders to users and record when they are used. One paediatric study found that  
50  
51  
52  
53  
54  
55  
56  
57  
58  
59  
60

1  
2  
3 the use of 'smart' inhalers increased treatment adherence to 84%, compared to 30%  
4 in the control group[83].  
5  
6  
7

- 8  
9 2. Diagnostic hubs. In the UK, regional diagnostic hubs for asthma care have been  
10 recommended in NHS England's Long Term Plan[84]. Implementation of diagnostic  
11 hubs is hoped to result in earlier and more accurate asthma diagnoses by improving  
12 access to objective testing and specialised interpretation. Hubs are designed to  
13 improve asthma outcomes by enabling most appropriate treatment initiation and  
14 monitoring. There is currently no evidence in the literature of the clinical effects of  
15 diagnostic hubs being used in the management of paediatric asthma.  
16  
17  
18  
19  
20  
21  
22  
23

## 24 **CONCLUSIONS**

25  
26  
27 Paediatric asthma outcomes are currently poor and many deaths are preventable. The  
28 aim should be to avoid asthma attacks occurring with appropriate maintenance therapy  
29 and they should be viewed as never events. In order to improve outcomes, accurate  
30 diagnosis and management are essential. Good asthma care extends beyond providing  
31 medication and should include education, as well as supported self-management advice.  
32 The use of PAAPs remains poor and a significant number of young people with asthma  
33 do not have one. Post-attack asthma reviews are a key opportunity to review maintenance  
34 medication and current symptom control.  
35  
36  
37  
38  
39  
40  
41  
42  
43  
44  
45  
46  
47  
48  
49  
50  
51  
52  
53  
54  
55  
56  
57  
58  
59  
60

## KEY MESSAGES

1. Paediatric asthma outcomes are poor and many deaths are preventable
2. Diagnosing asthma in childhood can be challenging and the diagnosis should be reviewed during follow up to ensure it is correct
3. Asthma attacks should be viewed as never events. Post-attack reviews are essential to optimise maintenance therapy and prevent future attacks
4. Education is key to improving asthma outcomes
5. Personalised Asthma Action Plans are essential and a significant number of children with asthma do not have one

1  
2  
3 **COMPETING INTERESTS**  
4  
5

6 MB received investigator-led research grants from Pfizer and Roche Diagnostics; speaker fees  
7 paid to Newcastle University from Novartis, Roche Diagnostics and TEVA. Travel expenses to  
8 educational meetings Boehringer Ingelheim and Vertex Pharmaceuticals. JM and JT: none  
9  
10  
11  
12  
13  
14  
15  
16  
17  
18  
19  
20  
21  
22  
23  
24  
25  
26  
27  
28  
29  
30  
31  
32  
33  
34  
35  
36  
37  
38  
39  
40  
41  
42  
43  
44  
45  
46  
47  
48  
49  
50  
51  
52  
53  
54  
55  
56  
57  
58  
59  
60

Confidential: For Review Only



## REFERENCES

1. Zar HJ, Ferkol TW. The global burden of respiratory disease-impact on child health. *Pediatr Pulmonol*. 2014;**49**:430-4 doi: 10.1002/ppul.23030.
2. Fleming M, Fitton CA, Steiner MFC, *et al*. Educational and health outcomes of children treated for asthma: Scotland-wide record linkage study of 683 716 children. *European Respiratory Journal*. 2019;**54**:1802309 doi: 10.1183/13993003.02309-2018.
3. Nichols M, Miller S, Treiber F, *et al*. Patient and Parent Perspectives on Improving Pediatric Asthma Self-Management Through a Mobile Health Intervention: Pilot Study. *JMIR Form Res*. 2020;**4**:e15295 doi: 10.2196/15295.
4. FitzGerald JM, Barnes PJ, Chipps BE, *et al*. The burden of exacerbations in mild asthma: a systematic review. *ERJ Open Res*. 2020;**6** doi: 10.1183/23120541.00359-2019.
5. Levy ML, Fleming L, Warner JO, *et al*. Paediatric asthma care in the UK: fragmented and fatally fallible. *Br J Gen Pract*. 2019;**69**:405-6 doi: 10.3399/bjgp19X704933.
6. Physicians RCo. The National Review of Asthma Deaths (NRAD). 2014.
7. Bush A, Pavord I. The Lancet Asthma Commission: treating children in primary care. *Prescriber*. 2018;**29**:28-32 doi: 10.1002/psb.1719.
8. McCormack MC, Enright PL. Making the diagnosis of asthma. *Respir Care*. 2008;**53**:583-90; discussion 90-2.
9. Kuruvilla ME, Lee FE, Lee GB. Understanding Asthma Phenotypes, Endotypes, and Mechanisms of Disease. *Clin Rev Allergy Immunol*. 2019;**56**:219-33 doi: 10.1007/s12016-018-8712-1.
10. Michel G, Silverman M, Strippoli MP, *et al*. Parental understanding of wheeze and its impact on asthma prevalence estimates. *Eur Respir J*. 2006;**28**:1124-30 doi: 10.1183/09031936.06.00008406.
11. Fainardi V, Santoro A, Caffarelli C. Preschool Wheezing: Trajectories and Long-Term Treatment. *Frontiers in Pediatrics*. 2020;**8** doi: 10.3389/fped.2020.00240.
12. Townshend J, Hails S, McKean M. Diagnosis of asthma in children. *Bmj*. 2007;**335**:198-202 doi: 10.1136/bmj.39234.651412.AE.
13. Gautier C, Charpin D. Environmental triggers and avoidance in the management of asthma. *J Asthma Allergy*. 2017;**10**:47-56 doi: 10.2147/jaa.S121276.

14. Win PH, Hussain I. Asthma Triggers: What Really Matters? *Clinical Asthma*. 2008;149-56 doi: 10.1016/B978-032304289-5.10017-7.
15. Keet CA, Matsui EC, McCormack MC, *et al.* Urban residence, neighborhood poverty, race/ethnicity, and asthma morbidity among children on Medicaid. *J Allergy Clin Immunol*. 2017;**140**:822-7 doi: 10.1016/j.jaci.2017.01.036.
16. Tarasidis GS, Wilson KF. Diagnosis of asthma: clinical assessment. *Int Forum Allergy Rhinol*. 2015;**5 Suppl 1**:S23-6 doi: 10.1002/alr.21518.
17. Been JV, Lugtenberg MJ, Smets E, *et al.* Preterm birth and childhood wheezing disorders: a systematic review and meta-analysis. *PLoS Med*. 2014;**11**:e1001596 doi: 10.1371/journal.pmed.1001596.
18. Mu M, Ye S, Bai MJ, *et al.* Birth weight and subsequent risk of asthma: a systematic review and meta-analysis. *Heart Lung Circ*. 2014;**23**:511-9 doi: 10.1016/j.hlc.2013.11.018.
19. Egan KB, Ettinger AS, Bracken MB. Childhood body mass index and subsequent physician-diagnosed asthma: a systematic review and meta-analysis of prospective cohort studies. *BMC Pediatr*. 2013;**13**:121 doi: 10.1186/1471-2431-13-121.
20. Holst GJ, Pedersen CB, Thygesen M, *et al.* Air pollution and family related determinants of asthma onset and persistent wheezing in children: nationwide case-control study. *Bmj*. 2020;**370**:m2791 doi: 10.1136/bmj.m2791.
21. Licari A, Castagnoli R, Brambilla I, *et al.* Asthma Endotyping and Biomarkers in Childhood Asthma. *Pediatr Allergy Immunol Pulmonol*. 2018;**31**:44-55 doi: 10.1089/ped.2018.0886.
22. Fahy JV. Type 2 inflammation in asthma--present in most, absent in many. *Nat Rev Immunol*. 2015;**15**:57-65 doi: 10.1038/nri3786.
23. Brusselle GG, Koppelman GH. Biologic Therapies for Severe Asthma. *N Engl J Med*. 2022;**386**:157-71 doi: 10.1056/NEJMra2032506.
24. McGregor MC, Krings JG, Nair P, *et al.* Role of Biologics in Asthma. *Am J Respir Crit Care Med*. 2019;**199**:433-45 doi: 10.1164/rccm.201810-1944CI.
25. Kavanagh J, Jackson DJ, Kent BD. Over- and under-diagnosis in asthma. *Breathe (Sheff)*. 2019;**15**:e20-e7 doi: 10.1183/20734735.0362-2018.

- 1  
2  
3 26. (NICE) NIfHaCE. Asthma: diagnosis, monitoring and chronic asthma management.  
4 [https://www.nice.org.uk/guidance/ng80/resources/asthma-diagnosis-monitoring-and-chronic-](https://www.nice.org.uk/guidance/ng80/resources/asthma-diagnosis-monitoring-and-chronic-asthma-management-pdf-183768797562120172021)  
5 [asthma-management-pdf-183768797562120172021](https://www.nice.org.uk/guidance/ng80/resources/asthma-diagnosis-monitoring-and-chronic-asthma-management-pdf-183768797562120172021).  
6  
7
- 8 27. Ullmann N, Mirra V, Di Marco A, *et al.* Asthma: Differential Diagnosis and  
9 Comorbidities. *Front Pediatr.* 2018;**6**:276 doi: 10.3389/fped.2018.00276.  
10  
11
- 12 28. Townshend J, Hails S, McKean M. Management of asthma in children. *Bmj.*  
13 2007;**335**:253-7 doi: 10.1136/bmj.39255.692222.AE.  
14
- 15 29. Asthma GIf. Global Strategy for Asthma Management and Prevention.  
16 <https://ginasthma.org/gina-reports/2021>.  
17
- 18 30. Berry M, Morgan A, Shaw DE, *et al.* Pathological features and inhaled corticosteroid  
19 response of eosinophilic and non-eosinophilic asthma. *Thorax.* 2007;**62**:1043-9 doi:  
20 10.1136/thx.2006.073429.  
21  
22
- 23 31. Petsky HL, Kew KM, Chang AB. Exhaled nitric oxide levels to guide treatment for  
24 children with asthma. *Cochrane Database Syst Rev.* 2016;**11**:CD011439 doi:  
25 10.1002/14651858.CD011439.pub2.  
26  
27
- 28 32. Plaza Moral V, Alonso Mostaza S, Alvarez Rodríguez C, *et al.* SPANISH GUIDELINE  
29 ON THE MANAGEMENT OF ASTHMA. *Journal of Investigational Allergology and Clinical*  
30 *Immunology.* 2016;**26 Suppl 1**:1-92 doi: 10.18176/jiaci.0065.  
31  
32
- 33 33. Papadopoulos NG, Arakawa H, Carlsen KH, *et al.* International consensus on (ICON)  
34 pediatric asthma. *Allergy.* 2012;**67**:976-97 doi: 10.1111/j.1398-9995.2012.02865.x.  
35  
36
- 37 34. Health SMO. Management of asthma  
38 [https://www.moh.gov.sg/docs/librariesprovider4/guidelines/cpg\\_asthma.pdf20082008](https://www.moh.gov.sg/docs/librariesprovider4/guidelines/cpg_asthma.pdf20082008).  
39  
40
- 41 35. Arakawa H, Adachi Y, Ebisawa M, *et al.* Japanese guidelines for childhood asthma 2020.  
42 *Allergol Int.* 2020;**69**:314-30 doi: 10.1016/j.alit.2020.02.005.  
43  
44
- 45 36. Sylvester KP, Youngs L, Rutter MA, *et al.* Early respiratory diagnosis: benefits of  
46 enhanced lung function assessment. *BMJ Open Respir Res.* 2021;**8** doi: 10.1136/bmjresp-2021-  
47 001012.  
48
- 49 37. Devonshire AL, Kumar R. Pediatric asthma: Principles and treatment. *Allergy Asthma*  
50 *Proc.* 2019;**40**:389-92 doi: 10.2500/aap.2019.40.4254.  
51  
52
- 53 38. Australia TNAC. Australian Asthma Handbook.  
54 <https://www.nationalasthma.org.au/health-professionals/australian-asthma-handbook20212021>.  
55  
56  
57  
58  
59  
60

- 1  
2  
3 39. Zealand AaRFN. New Zealand Child Asthma Guidelines: a quick reference guide.  
4 <https://www.asthmafoundation.org.nz/resources/nz-child-asthma-guidelines20202020>.  
5  
6  
7 40. Yang CL, Hicks EA, Mitchell P, *et al*. Canadian Thoracic Society 2021 Guideline  
8 update: Diagnosis and management of asthma in preschoolers, children and adults. *Canadian*  
9 *Journal of Respiratory, Critical Care, and Sleep Medicine*. 2021;**5**:348-61 doi:  
10 10.1080/24745332.2021.1945887.  
11  
12  
13 41. Dermot Nolan DM. Asthma - Diagnosis, Assessment and Management in General  
14 Practice Quick Reference Guide.  
15 [https://www.icgp.ie/speck/properties/asset/asset.cfm?type=LibraryAsset&id=B913F962%2DC2](https://www.icgp.ie/speck/properties/asset/asset.cfm?type=LibraryAsset&id=B913F962%2DC2B7%2D4C24%2D817B66C37E2F8A90&property=asset&revision=tip&disposition=inline&app=icgp&filename=Asthma%5F%2D%5FDiagnosis%5F%5FAssessment%5Fand%5FManagemen)  
17 [B7%2D4C24%2D817B66C37E2F8A90&property=asset&revision=tip&disposition=inline&app](https://www.icgp.ie/speck/properties/asset/asset.cfm?type=LibraryAsset&id=B913F962%2DC2B7%2D4C24%2D817B66C37E2F8A90&property=asset&revision=tip&disposition=inline&app=icgp&filename=Asthma%5F%2D%5FDiagnosis%5F%5FAssessment%5Fand%5FManagemen)  
18 [=icgp&filename=Asthma%5F%2D%5FDiagnosis%5F%5FAssessment%5Fand%5FManagemen](https://www.icgp.ie/speck/properties/asset/asset.cfm?type=LibraryAsset&id=B913F962%2DC2B7%2D4C24%2D817B66C37E2F8A90&property=asset&revision=tip&disposition=inline&app=icgp&filename=Asthma%5F%2D%5FDiagnosis%5F%5FAssessment%5Fand%5FManagemen)  
19 [t%5Fin%5FGeneral%5FPractice%5FQRG%2Epdf](https://www.icgp.ie/speck/properties/asset/asset.cfm?type=LibraryAsset&id=B913F962%2DC2B7%2D4C24%2D817B66C37E2F8A90&property=asset&revision=tip&disposition=inline&app=icgp&filename=Asthma%5F%2D%5FDiagnosis%5F%5FAssessment%5Fand%5FManagemen).  
20  
21  
22  
23  
24 42. Suissa S, Ernst P, Benayoun S, *et al*. Low-dose inhaled corticosteroids and the prevention  
25 of death from asthma. *N Engl J Med*. 2000;**343**:332-6 doi: 10.1056/nejm200008033430504.  
26  
27  
28 43. Muneswarao J, Hassali MA, Ibrahim B, *et al*. It is time to change the way we manage  
29 mild asthma: an update in GINA 2019. *Respir Res*. 2019;**20**:183- doi: 10.1186/s12931-019-1159-  
30 y.  
31  
32  
33 44. Scicchitano R, Aalbers R, Ukena D, *et al*. Efficacy and safety of budesonide/formoterol  
34 single inhaler therapy versus a higher dose of budesonide in moderate to severe asthma. *Curr*  
35 *Med Res Opin*. 2004;**20**:1403-18 doi: 10.1185/030079904x2051.  
36  
37  
38 45. Sobieraj D, Weeda E, Nguyen E, *et al*. Association of Inhaled Corticosteroids and Long-  
39 Acting  $\beta$ -Agonists as Controller and Quick Relief Therapy With Exacerbations and Symptom  
40 Control in Persistent Asthma: A Systematic Review and Meta-analysis. *JAMA*. 2018;**319** doi:  
41 10.1001/jama.2018.2769.  
42  
43  
44 46. UK A. Maintenance and Reliever Therapy (MART).  
45 <https://www.asthma.org.uk/advice/inhalers-medicines-treatments/inhalers-and-spacers/mart/>:  
46 Asthma UK 2021.  
47  
48  
49 47. Dixon EG, Rugg-Gunn CE, Sellick V, *et al*. Adverse drug reactions of leukotriene  
50 receptor antagonists in children with asthma: a systematic review. *BMJ Paediatr Open*.  
51 2021;**5**:e001206 doi: 10.1136/bmjpo-2021-001206.  
52  
53  
54  
55  
56  
57  
58  
59  
60

- 1  
2  
3 48. Boutopoulou B, Koumpagioti D, Matziou V, *et al.* Interventions on Adherence to  
4 Treatment in Children With Severe Asthma: A Systematic Review. *Front Pediatr.* 2018;**6**:232  
5 doi: 10.3389/fped.2018.00232.  
6  
7  
8 49. Guevara JP, Wolf FM, Grum CM, *et al.* Effects of educational interventions for self  
9 management of asthma in children and adolescents: systematic review and meta-analysis. *Bmj.*  
10 2003;**326**:1308-9 doi: 10.1136/bmj.326.7402.1308.  
11  
12 50. Gillette C, Rockich-Winston N, Kuhn JA, *et al.* Inhaler Technique in Children With  
13 Asthma: A Systematic Review. *Acad Pediatr.* 2016;**16**:605-15 doi: 10.1016/j.acap.2016.04.006.  
14  
15 51. Capanoglu M, Dibek Misirlioglu E, Toyran M, *et al.* Evaluation of inhaler technique,  
16 adherence to therapy and their effect on disease control among children with asthma using  
17 metered dose or dry powder inhalers. *J Asthma.* 2015;**52**:838-45 doi:  
18 10.3109/02770903.2015.1028075.  
19  
20 52. Searle A, Jago R, Henderson J, *et al.* Children's, parents' and health professionals' views  
21 on the management of childhood asthma: a qualitative study. *NPJ Prim Care Respir Med.*  
22 2017;**27**:53- doi: 10.1038/s41533-017-0053-7.  
23  
24 53. Ducharme FM, Bhogal SK. The role of written action plans in childhood asthma. *Curr*  
25 *Opin Allergy Clin Immunol.* 2008;**8**:177-88 doi: 10.1097/ACI.0b013e3282f7cd58.  
26  
27 54. Lakupoch K, Manuyakorn W, Preutthipan A, *et al.* The effectiveness of newly developed  
28 written asthma action plan in improvement of asthma outcome in children. *Asian Pac J Allergy*  
29 *Immunol.* 2018;**36**:88-92 doi: 10.12932/ap-010217-0002.  
30  
31 55. UK A. The reality of asthma care in the UK.  
32 [https://www.asthma.org.uk/578f5bcf/globalassets/get-involved/external-affairs-](https://www.asthma.org.uk/578f5bcf/globalassets/get-involved/external-affairs-campaigns/publications/annual-asthma-care-survey/annual-asthma-survey-2018/asthmauk-annual-asthma-survey-2018-v7.pdf2018)  
33 [campaigns/publications/annual-asthma-care-survey/annual-asthma-survey-2018/asthmauk-](https://www.asthma.org.uk/578f5bcf/globalassets/get-involved/external-affairs-campaigns/publications/annual-asthma-care-survey/annual-asthma-survey-2018/asthmauk-annual-asthma-survey-2018-v7.pdf2018)  
34 [annual-asthma-survey-2018/asthmauk-](https://www.asthma.org.uk/578f5bcf/globalassets/get-involved/external-affairs-campaigns/publications/annual-asthma-care-survey/annual-asthma-survey-2018/asthmauk-annual-asthma-survey-2018-v7.pdf2018)  
35 [annual-asthma-survey-2018-v7.pdf2018](https://www.asthma.org.uk/578f5bcf/globalassets/get-involved/external-affairs-campaigns/publications/annual-asthma-care-survey/annual-asthma-survey-2018/asthmauk-annual-asthma-survey-2018-v7.pdf2018).  
36  
37 56. Wanrooij VH, Willeboordse M, Dompeling E, *et al.* Exercise training in children with  
38 asthma: a systematic review. *Br J Sports Med.* 2014;**48**:1024-31 doi: 10.1136/bjsports-2012-  
39 091347.  
40  
41 57. Lu KD, Forno E. Exercise and lifestyle changes in pediatric asthma. *Curr Opin Pulm*  
42 *Med.* 2020;**26**:103-11 doi: 10.1097/MCP.0000000000000636.  
43  
44 58. Society SAT. Guidelines for the management of chronic asthma in adolescents and  
45 adults. [https://pulmonology.co.za/wp-content/uploads/2016/11/Guideline\\_8.pdf20072016](https://pulmonology.co.za/wp-content/uploads/2016/11/Guideline_8.pdf20072016).  
46  
47  
48  
49  
50  
51  
52  
53  
54  
55  
56  
57  
58  
59  
60

- 1  
2  
3 59. Doroudchi A, Pathria M, Modena BD. Asthma biologics: Comparing trial designs,  
4 patient cohorts and study results. *Ann Allergy Asthma Immunol.* 2020;**124**:44-56 doi:  
5 10.1016/j.anai.2019.10.016.  
6  
7  
8 60. Galli SJ, Tsai M. IgE and mast cells in allergic disease. *Nat Med.* 2012;**18**:693-704 doi:  
9 10.1038/nm.2755.  
10  
11 61. Busse WW, Morgan WJ, Gergen PJ, *et al.* Randomized trial of omalizumab (anti-IgE) for  
12 asthma in inner-city children. *N Engl J Med.* 2011;**364**:1005-15 doi: 10.1056/NEJMoa1009705.  
13  
14 62. Kulus M, Hébert J, Garcia E, *et al.* Omalizumab in children with inadequately controlled  
15 severe allergic (IgE-mediated) asthma. *Curr Med Res Opin.* 2010;**26**:1285-93 doi:  
16 10.1185/03007991003771338.  
17  
18 63. Corren J, Kavati A, Ortiz B, *et al.* Efficacy and safety of omalizumab in children and  
19 adolescents with moderate-to-severe asthma: A systematic literature review. *Allergy Asthma*  
20 *Proc.* 2017;**38**:250-63 doi: 10.2500/aap.2017.38.4067.  
21  
22 64. Kau AL, Korenblat PE. Anti-interleukin 4 and 13 for asthma treatment in the era of  
23 endotypes. *Curr Opin Allergy Clin Immunol.* 2014;**14**:570-5 doi:  
24 10.1097/aci.0000000000000108.  
25  
26 65. Corren J, Castro M, Chanez P, *et al.* Dupilumab improves symptoms, quality of life, and  
27 productivity in uncontrolled persistent asthma. *Ann Allergy Asthma Immunol.* 2019;**122**:41-9.e2  
28 doi: 10.1016/j.anai.2018.08.005.  
29  
30 66. Castro M, Corren J, Pavord ID, *et al.* Dupilumab Efficacy and Safety in Moderate-to-  
31 Severe Uncontrolled Asthma. *New England Journal of Medicine.* 2018;**378**:2486-96 doi:  
32 10.1056/NEJMoa1804092.  
33  
34 67. Tan LD, Bratt JM, Godor D, *et al.* Benralizumab: a unique IL-5 inhibitor for severe  
35 asthma. *J Asthma Allergy.* 2016;**9**:71-81 doi: 10.2147/jaa.S78049.  
36  
37 68. Ortega HG, Liu MC, Pavord ID, *et al.* Mepolizumab Treatment in Patients with Severe  
38 Eosinophilic Asthma. *New England Journal of Medicine.* 2014;**371**:1198-207 doi:  
39 10.1056/NEJMoa1403290.  
40  
41 69. Pavord ID, Korn S, Howarth P, *et al.* Mepolizumab for severe eosinophilic asthma  
42 (DREAM): a multicentre, double-blind, placebo-controlled trial. *Lancet.* 2012;**380**:651-9 doi:  
43 10.1016/s0140-6736(12)60988-x.  
44  
45  
46  
47  
48  
49  
50  
51  
52  
53  
54  
55  
56  
57  
58  
59  
60

- 1  
2  
3 70. Khatri S, Moore W, Gibson PG, *et al.* Assessment of the long-term safety of  
4 mepolizumab and durability of clinical response in patients with severe eosinophilic asthma. *J*  
5 *Allergy Clin Immunol.* 2019;**143**:1742-51.e7 doi: 10.1016/j.jaci.2018.09.033.  
6  
7  
8 71. Gupta A, Ikeda M, Geng B, *et al.* Long-term safety and pharmacodynamics of  
9 mepolizumab in children with severe asthma with an eosinophilic phenotype. *J Allergy Clin*  
10 *Immunol.* 2019;**144**:1336-42.e7 doi: 10.1016/j.jaci.2019.08.005.  
11  
12  
13 72. Wechsler M, Hickey L, Garin M, *et al.* Efficacy of Reslizumab Treatment in  
14 Exacerbation-Prone Patients with Severe Eosinophilic Asthma. *The Journal of Allergy and*  
15 *Clinical Immunology: In Practice.* 2020;**8** doi: 10.1016/j.jaip.2020.06.009.  
16  
17  
18 73. Virchow JC, Katial R, Brusselle GG, *et al.* Safety of Reslizumab in Uncontrolled Asthma  
19 with Eosinophilia: A Pooled Analysis from 6 Trials. *The Journal of Allergy and Clinical*  
20 *Immunology: In Practice.* 2020;**8**:540-8.e1 doi: <https://doi.org/10.1016/j.jaip.2019.07.038>.  
21  
22  
23 74. Kolbeck R, Kozhich A, Koike M, *et al.* MEDI-563, a humanized anti-IL-5 receptor alpha  
24 mAb with enhanced antibody-dependent cell-mediated cytotoxicity function. *J Allergy Clin*  
25 *Immunol.* 2010;**125**:1344-53.e2 doi: 10.1016/j.jaci.2010.04.004.  
26  
27  
28 75. Harrison TW, Chanez P, Menzella F, *et al.* Onset of effect and impact on health-related  
29 quality of life, exacerbation rate, lung function, and nasal polyposis symptoms for patients with  
30 severe eosinophilic asthma treated with benralizumab (ANDHI): a randomised, controlled, phase  
31 3b trial. *Lancet Respir Med.* 2021;**9**:260-74 doi: 10.1016/s2213-2600(20)30414-8.  
32  
33  
34 76. Kallenbach JM, Frankel AH, Lapinsky SE, *et al.* Determinants of near fatality in acute  
35 severe asthma. *Am J Med.* 1993;**95**:265-72 doi: 10.1016/0002-9343(93)90278-w.  
36  
37  
38 77. Ardura-Garcia C, Stolbrink M, Zaidi S, *et al.* Predictors of repeated acute hospital  
39 attendance for asthma in children: A systematic review and meta-analysis. *Pediatr Pulmonol.*  
40 2018;**53**:1179-92 doi: 10.1002/ppul.24068.  
41  
42  
43 78. Nwaru BI, Ekström M, Hasvold P, *et al.* Overuse of short-acting  $\beta_2$ -  
44 agonists in asthma is associated with increased risk of exacerbation and mortality: a nationwide  
45 cohort study of the global SABINA programme. *European Respiratory Journal.*  
46 2020;**55**:1901872 doi: 10.1183/13993003.01872-2019.  
47  
48  
49 79. Keeley D, Baxter N. Conflicting asthma guidelines cause confusion in primary care.  
50 *BMJ.* 2018;**360**:k29 doi: 10.1136/bmj.k29.  
51  
52  
53  
54  
55  
56  
57  
58  
59  
60

- 1  
2  
3 80. Mosnaim G, Li H, Martin M, *et al.* A tailored mobile health intervention to improve  
4 adherence and asthma control in minority adolescents. *J Allergy Clin Immunol Pract.*  
5 2015;**3**:288-90.e1 doi: 10.1016/j.jaip.2014.10.011.  
6  
7  
8 81. Katwa U, Rivera E. Asthma Management in the Era of Smart-Medicine: Devices,  
9 Gadgets, Apps and Telemedicine. *Indian J Pediatr.* 2018;**85**:757-62 doi: 10.1007/s12098-018-  
10 2611-6.  
11  
12  
13 82. Burbank AJ, Lewis SD, Hewes M, *et al.* Mobile-based asthma action plans for  
14 adolescents. *J Asthma.* 2015;**52**:583-6 doi: 10.3109/02770903.2014.995307.  
15  
16  
17 83. Chan AH, Stewart AW, Harrison J, *et al.* The effect of an electronic monitoring device  
18 with audiovisual reminder function on adherence to inhaled corticosteroids and school  
19 attendance in children with asthma: a randomised controlled trial. *Lancet Respir Med.*  
20 2015;**3**:210-9 doi: 10.1016/s2213-2600(15)00008-9.  
21  
22  
23 84. UK A. Recovery and reset for respiratory: restoring and improving basic care for patients  
24 with lung disease.  
25  
26  
27 [https://www.asthma.org.uk/283059c7/globalassets/campaigns/publications/restarting-basic-care-](https://www.asthma.org.uk/283059c7/globalassets/campaigns/publications/restarting-basic-care-final.pdf20202020)  
28 [final.pdf20202020](https://www.asthma.org.uk/283059c7/globalassets/campaigns/publications/restarting-basic-care-final.pdf20202020).  
29  
30  
31  
32  
33  
34  
35  
36  
37  
38  
39  
40  
41  
42  
43  
44  
45  
46  
47  
48  
49  
50  
51  
52  
53  
54  
55  
56  
57  
58  
59  
60
